# Supplementary material for: Combining Semi-Targeted Metabolomics and Machine Learning to Identify Metabolic Alterations in the Serum and Urine of Hospitalized Patients with COVID-19
Source: MDPI journal article supplement (doi:10.3390/biom13010163), 2023-01-12
Supplement: s1 [file s1]

**Supplementary Table S1.** Demographic and clinical characteristics of the patients and the healthy subjects

|                                     | Healthy subjects<br>(n = 50) | COVID-19 negative patients<br>(n = 45) | COVID-19 positive patients<br>(n = 126) |
|-------------------------------------|------------------------------|----------------------------------------|-----------------------------------------|
| Demographic variables               |                              |                                        |                                         |
| Sex, male                           | 38 (76.0)                    | 30 (66.7)                              | 68 (54.8) <sup>a</sup>                  |
| Age, years                          | 75 (66- 84)                  | 84 (75- 89) <sup>b</sup>               | 71 (58-83)                              |
| Smoking, n (%)                      | 19 (38.0)                    | 16 (35.6)                              | 6 (4.8) <sup>b,d</sup>                  |
| Alcohol intake, n (%)               | 28 (56.0)                    | 7 (15.5) <sup>b</sup>                  | 6 (4.8) <sup>b,c</sup>                  |
| Comorbidities                       |                              |                                        |                                         |
| Type 2 diabetes mellitus, n (%)     | 0                            | 22 (48.9)                              | 30 (23.8) <sup>e</sup>                  |
| Cardiovascular disease, n (%)       | 0                            | 18 (40)                                | 68 (54)                                 |
| Chronic liver disease, n (%)        | 0                            | 0                                      | 1 (0.8)                                 |
| Chronic lung disease, n (%)         | 0                            | 0                                      | 18 (14.3)                               |
| Chronic kidney disease, n (%)       | 0                            | 19 (42.2)                              | 22 (17.5) <sup>d</sup>                  |
| Chronic neurological disease n (%), | 0                            | 0                                      | 29 (23)                                 |
| Cancer, n (%)                       | 0                            | 17 (37.8)                              | 16 (12.7) <sup>e</sup>                  |
| Charlson index                      |                              |                                        |                                         |
| No comorbidity, n (%)               | NA                           | 10 (22.2)                              | 83 (65.9) <sup>e,*</sup>                |
| Low comorbidity, n (%)              |                              | 18 (40.0)                              | 29 (23.0)                               |
| High comorbidity, n (%)             |                              | 17 (37.8)                              | 14 (11.1)                               |
| McCabe index                        |                              |                                        |                                         |
| RFD, n (%)                          | NA                           | 10 (22.2)                              | 7 (5.6) <sup>e,*</sup>                  |
| UFD, n (%)                          |                              | 19 (42.2)                              | 31 (24.6)                               |
| NFD, n (%)                          |                              | 16 (35.6)                              | 88 (69.8)                               |
| Medications                         |                              |                                        |                                         |
| ACEIs, n (%)                        | NA                           | 14 (31.1)                              | 24 (27.0)                               |
| ARAs, n (%)                         | NA                           | 12 (26.7)                              | 21 (16.7)                               |
| Oral antidiabetics, n (%)           | NA                           | 19 (42.2)                              | 37 (29.4)                               |
| Insulin, n (%)                      | NA                           | 9 (20.0)                               | 28 (22.2)                               |
| Statins, n (%)                      | NA                           | 16 (35.6)                              | 44 (34.9)                               |

<sup>a</sup> P < 0.01, <sup>b</sup> P < 0.001, with respect to healthy subjects; <sup>c</sup> P < 0.05, <sup>d</sup> P < 0.01, <sup>e</sup> P < 0.001 with respect to COVID-19 negative patients. \*: Global P-value including the three categories of each index. Statistical analyses performed by the Student's *t* test (quantitative) or the  $\chi$ -square test (qualitative). Results are given as medians and 95% CI or as numbers and percentages. ACEIs: Angiotensin converting enzyme inhibitors; ARAs, Angiotensin II receptor antagonists; NFD: Non-fatal disease; RFD: Rapidly fatal disease. UFD: Ultimately fatal disease

**Supplementary Table S2.** Gradient Boosting Machine scripts

See next pages.



```
In [1]: # Data treatment
# Data treatment
import numpy as np
import pandas as pd
import statsmodels.api as sm

# Graphs
#
import matplotlib.pyplot as plt

# Processing and modeling
#
from sklearn.datasets import load_boston
from sklearn.ensemble import GradientBoostingClassifier
from sklearn.metrics import accuracy_score
from sklearn.metrics import confusion_matrix
from sklearn.compose import ColumnTransformer
from sklearn.preprocessing import OneHotEncoder
from sklearn.model_selection import cross_val_score
from sklearn.model_selection import train_test_split
from sklearn.model_selection import RepeatedKFold
from sklearn.model_selection import GridSearchCV
from sklearn.model_selection import ParameterGrid
from sklearn.inspection import permutation_importance
import multiprocessing

# Warnings configuration
#
import warnings
warnings.filterwarnings('once')
```

```
In [5]: datos = pd.read_csv('Cov_Contr_Pl.csv')
```

```
/Users/gerard/opt/anaconda3/lib/python3.8/site-packages/ipykernel/ipkernel.py:287: DeprecationWarning: "should_run_async" will not call "transform_cell" automatically in the future. Please pass the result to "transformed_cell" argument and any exception that happen during thetransform in "preprocessing_exc_tuple" in IPython 7.17 and above.
and should_run_async(code)
```

```
In [6]: # Division of data into train and test
#
X_train, X_test, y_train, y_test = train_test_split(
    datos, drop(columns = 'Group'),
    datos['Group'],
    random_state = 123
)

# One-hot-encoding of categorical variables
#
# The name of the numerical and categorical columns is identified
cat_cols = X_train.select_dtypes(include=['object', 'category']).columns.to_list()
numeric_cols = X_train.select_dtypes(include=['float64', 'int']).columns.to_list()

# One-hot-encoding is applied only to categorical columns
preprocessor = ColumnTransformer(
    [ ('onehot', OneHotEncoder(handle_unknown='ignore'), cat_cols)],
    remainder='passthrough'
)

# Once the ColumnTransformer object has been defined, with the fit() method
# method, the transformations are learned with the training data and are applied to
# the two sets with transform(). Both operations at the same time with fit_transform().
X_train_prep = preprocessor.fit_transform(X_train)
X_test_prep = preprocessor.transform(X_test)
```

```
In [7]: # Grid of evaluated hyperparameters
#
param_grid = {'n_estimators': [50, 100, 500, 1000],
              'max_features': ['auto', 'sqrt', 'log2'],
              'max_depth': [None, 1, 3, 5, 10, 20],
              'subsample': [0.5, 1],
              'learning_rate': [0.001, 0.01, 0.1]
            }

# Grid search with cross validation
#
grid = GridSearchCV(
    estimator = GradientBoostingClassifier(random_state=123),
    param_grid = param_grid,
    scoring = 'accuracy',
    n_jobs = multiprocessing.cpu_count() - 1,
    cv = RepeatedKFold(n_splits=3, n_repeats=1, random_state=123),
    refit = True,
    verbose = 0,
    return_train_score = True
)

grid.fit(X = X_train_prep, y = y_train)

# Results
#
resultados = pd.DataFrame(grid.cv_results_)
resultados.filter(regex = '(param|mean_t|std_t)') \
    .drop(columns = 'params') \
    .sort_values('mean_test_score', ascending = False) \
    .head(4)
```

```
Out[7]:
```

|     | param_learning_rate | param_max_depth | param_max_features | param_n_estimators | param_subsample | mean_test_score | std_test_score | mean_train_score | std_train_score |
|-----|---------------------|-----------------|--------------------|--------------------|-----------------|-----------------|----------------|------------------|-----------------|
| 429 | 0.1                 | 20              | log2               | 500                | 1               | 0.976375        | 0.000261       | 1.0              | 0.0             |
| 309 | 0.1                 | None            | log2               | 500                | 1               | 0.976375        | 0.000261       | 1.0              | 0.0             |
| 405 | 0.1                 | 10              | log2               | 500                | 1               | 0.976375        | 0.000261       | 1.0              | 0.0             |
| 207 | 0.01                | 3               | sqrt               | 1000               | 1               | 0.976190        | 0.019440       | 1.0              | 0.0             |

```
In [8]: # Better hyperparameters by cross-validation
#
print("-----")
print("Mejores hiperparámetros encontrados (cv)")
print("-----")
print(grid.best_params_, "\n", grid.best_score_, grid.scoring)
```

```
Mejores hiperparámetros encontrados (cv)
('learning_rate': 0.1, 'max_depth': None, 'max_features': 'log2', 'n_estimators': 500, 'subsample': 1) : 0.976375046142488 accuracy
```

```
/Users/gerard/opt/anaconda3/lib/python3.8/site-packages/ipykernel/ipkernel.py:287: DeprecationWarning: "should_run_async" will not call "transform_cell" automatically in the future. Please pass the result to "transformed_cell" argument and any exception that happen during thetransform in "preprocessing_exc_tuple" in IPython 7.17 and above.
and should_run_async(code)
```

```
In [9]: modelo_final = grid.best_estimator_
```

```
In [10]: # Final model test error
#
predicciones = modelo_final.predict(X = X_test_prep)
predicciones[:10]
```

```
Out[10]: array([1, 1, 1, 1, 1, 1, 1, 1, 1, 1])
```

```
In [11]: mat_confusion = confusion_matrix(
    y_true = y_test,
    y_pred = predicciones
)

accuracy = accuracy_score(
    y_true = y_test,
    y_pred = predicciones,
    normalize = True
)

print("Matriz de confusión")
print("-----")
print(mat_confusion)
print("")
print(f"El accuracy de test es: (100 * accuracy) %")
```

```
Matriz de confusión
[[12  0]
 [ 1 30]]

El accuracy de test es: 97.67441860465115 %
```

```
/Users/gerard/opt/anaconda3/lib/python3.8/site-packages/ipykernel/ipkernel.py:287: DeprecationWarning: "should_run_async" will not call "transform_cell" automatically in the future. Please pass the result to "transformed_cell" argument and any exception that happen during thetransform in "preprocessing_exc_tuple" in IPython 7.17 and above.
and should_run_async(code)
```

```
In [42]: import seaborn as sns
import matplotlib.pyplot as plt

ax = plt.subplot()
sns.heatmap(mat_confusion, annot=True, ax = ax, cmap=plt.cm.Reds); #annot=True to annotate cells

# labels, title and ticks
ax.set_xlabel('Predicted labels');ax.set_ylabel('True labels');
ax.set_title('Confusion Matrix');
ax.xaxis.set_ticklabels(['Control', 'Covid']); ax.yaxis.set_ticklabels(['Control', 'Covid']);
plt.savefig('Matrix_Pl_Cov_Cont.pdf', format='pdf', dpi=300, transparent = True, bbox_inches='tight')
```

```
"should_run_async" will not call "transform_cell" automatically in the future. Please pass the result to "transformed_cell" argument and any exception that happen during thetransform in "preprocessing_exc_tuple" in IPython 7.17 and above.
```

```
In [28]: # roc curve and auc score
from sklearn.datasets import make_classification
from sklearn.neighbors import KNeighborsClassifier
from sklearn.ensemble import RandomForestClassifier
from sklearn.model_selection import train_test_split
from sklearn.metrics import roc_curve
from sklearn.metrics import roc_auc_score

def plot_roc_curve(fpr, tpr):
    plt.plot(fpr, tpr, color='gold', label='ROC')
    plt.plot([0, 1], [0, 1], color='darkblue', linestyle='--')
    plt.xlabel('False Positive Rate')
    plt.ylabel('True Positive Rate')
    plt.title('Receiver Operating Characteristic (ROC) Curve')
    plt.legend()
    plt.savefig('AUC_Pl_Cov_Cont.pdf', format='pdf', dpi=300, transparent = True, bbox_inches='tight')
```

```
"should_run_async" will not call "transform_cell" automatically in the future. Please pass the result to "transformed_cell" argument and any exception that happen during thetransform in "preprocessing_exc_tuple" in IPython 7.17 and above.
```

```
In [29]: probs = modelo_final.predict(X_test_prep)
```

```
In [30]: auc = roc_auc_score(y_test, probs)
print('AUC: %.2f' % auc)
```

```
AUC: 0.98
```

```
"should_run_async" will not call "transform_cel" automatically in the future. Please pass the result to "transformed_cell" argument and any exception that happen during thetransform in "preprocessing_exc_tuple" in IPython 7.17 and above.
```

```
In [31]: fpr, tpr, thresholds = roc_curve(y_test, probs)

plot_roc_curve(fpr, tpr)
```

```
"should_run_async" will not call "transform_cell" automatically in the future. Please pass the result to "transformed_cell" argument and any exception that happen during thetransform in "preprocessing_exc_tuple" in IPython 7.17 and above.
```

```
In [17]: # Probability prediction
#
predicciones = modelo_final.predict_proba(X = X_test_prep)
predicciones[:5, :]
```

```
/Users/gerard/opt/anaconda3/lib/python3.8/site-packages/ipykernel/ipkernel.py:287: DeprecationWarning: "should_run_async" will not call "transform_cell" automatically in the future. Please pass the result to "transformed_cell" argument and any exception that happen during thetransform in "preprocessing_exc_tuple" in IPython 7.17 and above.
and should_run_async(code)
```

```
Out[17]: array([[9.95403759e-12, 1.00000000e+00],
               [1.33226763e-15, 1.00000000e+00],
               [3.33066097e-15, 1.00000000e+00],
               [2.66453526e-15, 1.00000000e+00],
               [1.15945744e-05, 9.9998405e-01]])
```

```
In [18]: # Classification using the highest probability class
#
df_predicciones = pd.DataFrame(data=predicciones, columns=['0', '1'])
df_predicciones['clasificacion_default_0.5'] = np.where(df_predicciones['1'] > df_predicciones['0'], 0, 1)
df_predicciones.head(3)
```

```
/Users/gerard/opt/anaconda3/lib/python3.8/site-packages/ipykernel/ipkernel.py:287: DeprecationWarning: "should_run_async" will not call "transform_cell" automatically in the future. Please pass the result to "transformed_cell" argument and any exception that happen during thetransform in "preprocessing_exc_tuple" in IPython 7.17 and above.
and should_run_async(code)
```

```
Out[18]:
```

|   | 0              | 1   | clasificacion_default_0.5 |
|---|----------------|-----|---------------------------|
| 0 | 9.95403759e-12 | 1.0 | 1                         |
| 1 | 1.33226763e-15 | 1.0 | 1                         |
| 2 | 3.33066097e-15 | 1.0 | 1                         |

```
In [19]: # Final classification using a threshold of 0.8 for class 1.
#
df_predicciones['clasificacion_custom_0.8'] = np.where(df_predicciones['1'] > 0.9, 1, 0)
df_predicciones[df_predicciones['clasificacion_custom_0.8']!=df_predicciones['clasificacion_default_0.5']] \
    .head(3)
```

```
/Users/gerard/opt/anaconda3/lib/python3.8/site-packages/ipykernel/ipkernel.py:287: DeprecationWarning: "should_run_async" will not call "transform_cell" automatically in the future. Please pass the result to "transformed_cell" argument and any exception that happen during thetransform in "preprocessing_exc_tuple" in IPython 7.17 and above.
and should_run_async(code)
```

```
Out[19]:
```

|   | 0              | 1   | clasificacion_default_0.5 | clasificacion_custom_0.8 |
|---|----------------|-----|---------------------------|--------------------------|
| 0 | 9.95403759e-12 | 1.0 | 1                         | 1                        |
| 1 | 1.33226763e-15 | 1.0 | 1                         | 1                        |
| 2 | 3.33066097e-15 | 1.0 | 1                         | 1                        |

```
In [20]: importancia_predictores = pd.DataFrame(
    {'predictor': datos.drop(columns = "Group").columns,
     'importancia': modelo_final.feature_importances_
    })

print("Importancia de los predictores en el modelo")
print("-----")
importancia_predictores.sort_values('importancia', ascending=False)
```

```
Importancia de los predictores en el modelo
```

```
/Users/gerard/opt/anaconda3/lib/python3.8/site-packages/ipykernel/ipkernel.py:287: DeprecationWarning: "should_run_async" will not call "transform_cell" automatically in the future. Please pass the result to "transformed_cell" argument and any exception that happen during thetransform in "preprocessing_exc_tuple" in IPython 7.17 and above.
and should_run_async(code)
```

```
Out[20]:
```

|     | predictor              | importancia  |
|-----|------------------------|--------------|
| 34  | Erythronic acid        | 1.789223e-01 |
| 22  | Glyceric acid          | 9.690568e-02 |
| 44  | d-Xylitol              | 9.163407e-02 |
| 62  | Galacturonic acid      | 8.760900e-02 |
| 30  | d-Threitol             | 7.278913e-02 |
| ... | ...                    | ...          |
| 79  | Choline                | 4.409360e-07 |
| 1   | Lactic acid            | 4.235612e-07 |
| 14  | Leucine                | 3.247836e-07 |
| 52  | 3-Phosphoglyceric acid | 1.493937e-09 |
| 71  | Oleic acid             | 2.037395e-11 |

85 rows x 2 columns

```
In [23]: import shap
shap.initjs()
explainer = shap.TreeExplainer(modelo_final)
```

```
In [27]: import numpy as np
import matplotlib as mpl
import matplotlib.pyplot as plt
from matplotlib import cm

from collections import OrderedDict

shap.summary_plot(shap_values, X_test, plot_type='bar', max_display=5, show=False)
plt.savefig('SHAP_Pl_Cov_Cont.pdf', format='pdf', dpi=300, transparent = True, bbox_inches='tight')
```

```
"should_run_async" will not call "transform_cell" automatically in the future. Please pass the result to "transformed_cell" argument and any exception that happen during thetransform in "preprocessing_exc_tuple" in IPython 7.17 and above.
```

```
In [44]: shap_values = explainer.shap_values(X_test, approximate=False, check_additivity=False)
shap.summary_plot(shap_values, X_test)
```



```
In [1]: # Data treatment
import numpy as np
import pandas as pd
import statsmodels.api as sm

# Graphs
import matplotlib.pyplot as plt

# Processing and modeling
from sklearn.datasets import load_boston
from sklearn.ensemble import GradientBoostingClassifier
from sklearn.metrics import accuracy_score
from sklearn.metrics import confusion_matrix
from sklearn.compose import ColumnTransformer
from sklearn.preprocessing import OneHotEncoder
from sklearn.model_selection import cross_val_score
from sklearn.model_selection import train_test_split
from sklearn.model_selection import RepeatedKFold
from sklearn.model_selection import GridSearchCV
from sklearn.model_selection import ParameterGrid
from sklearn.inspection import permutation_importance
import multiprocessing

# Warnings configuration
import warnings
warnings.filterwarnings('once')
```

```
In [2]: datos = pd.read_csv("Pl_NoCov_Control.csv")

/Users/gerard/opt/anaconda3/lib/python3.8/site-packages/ipykernel/ipkernel.py:287: DeprecationWarning: 'should_run_async' will not call 'transform_cell' automatically in the future. Please pass the result to 'transformed_cell' argument and any exception that happen during thetransform in 'preprocessing_exc_tuple' in IPython 7.17 and above.
  and should_run_async(code)
```

```
In [3]: # Division of data into train and test
X_train, X_test, y_train, y_test = train_test_split(
    datos.drop(columns = 'Group'),
    datos['Group'],
    random_state = 123
)

# One-hot-encoding of categorical variables
# The name of the numerical and categorical columns is identified
cat_cols = X_train.select_dtypes(include=['object', 'category']).columns.tolist()
numeric_cols = X_train.select_dtypes(include=['float64', 'int']).columns.tolist()

# One-hot-encoding is applied only to categorical columns
preprocessor = ColumnTransformer(
    [
        ('onehot', OneHotEncoder(handle_unknown='ignore'), cat_cols),
        ('remainder', 'passthrough', numeric_cols)
    ]
)

# Once the ColumnTransformer object has been defined, with the fit() method
# method, the transformations are learned with the training data and are applied to
# the two sets with transform(). Both operations at the same time with fit_transform().
X_train_prep = preprocessor.fit_transform(X_train)
X_test_prep = preprocessor.transform(X_test)
```

```
In [4]: # Grid of evaluated hyperparameters
# =====
param_grid = {
    'n_estimators': [50, 100, 500, 1000],
    'max_features': ['auto', 'sqrt', 'log2'],
    'max_depth': [None, 1, 3, 5, 10, 20],
    'subsample': [0.5, 1],
    'learning_rate': [0.001, 0.01, 0.1]
}

# Grid search with cross validation
grid = GridSearchCV(
    estimator = GradientBoostingClassifier(random_state=123),
    param_grid = param_grid,
    scoring = 'accuracy',
    n_jobs = multiprocessing.cpu_count() - 1,
    cv = RepeatedKFold(n_splits=3, n_repeats=1, random_state=123),
    refit = True,
    verbose = 0,
    return_train_score = True
)

grid.fit(X = X_train_prep, y = y_train)

# Results
# =====
resultados = pd.DataFrame(grid.cv_results_)
resultados.filter(regex = '(param|mean_test_score|std_test_score)') \
    .drop(columns = 'params') \
    .sort_values('mean_test_score', ascending = False) \
    .head(4)
```

```
Out[4]:
```

|     | param_learning_rate | param_max_depth | param_max_features | param_n_estimators | param_subsample | mean_test_score | std_test_score | mean_train_score | std_train_score |
|-----|---------------------|-----------------|--------------------|--------------------|-----------------|-----------------|----------------|------------------|-----------------|
| 224 | 0.01                | 5               | sqrt               | 100                | 0.5             | 0.985507        | 0.020496       | 1.0              | 0.0             |
| 227 | 0.01                | 5               | sqrt               | 50                 | 1               | 0.971014        | 0.020496       | 1.0              | 0.0             |
| 249 | 0.01                | 10              | sqrt               | 50                 | 1               | 0.971014        | 0.020496       | 1.0              | 0.0             |
| 369 | 0.1                 | 5               | sqrt               | 50                 | 1               | 0.971014        | 0.020496       | 1.0              | 0.0             |

```
In [5]: # Better hyperparameters by cross-validation
print("-----")
print("Mejores hiperparámetros encontrados (cv)")
print("-----")
print(grid.best_params_, ":", grid.best_score, grid.scoring)
```

```
Mejores hiperparámetros encontrados (cv)
('learning_rate': 0.01, 'max_depth': 5, 'max_features': 'sqrt', 'n_estimators': 50, 'subsample': 0.5) : 0.9855072463768115 accuracy
```

```
/Users/gerard/opt/anaconda3/lib/python3.8/site-packages/ipykernel/ipkernel.py:287: DeprecationWarning: 'should_run_async' will not call 'transform_cell' automatically in the future. Please pass the result to 'transformed_cell' argument and any exception that happen during thetransform in 'preprocessing_exc_tuple' in IPython 7.17 and above.
  and should_run_async(code)
```

```
In [6]: modelo_final = grid.best_estimator_

In [7]: # Final model test error
predicciones = modelo_final.predict(X = X_test_prep)
predicciones[:10]
```

```
Out[7]: array([0, 0, 1, 0, 0, 1, 1, 0, 0, 1])

In [8]: mat_confusion = confusion_matrix(
    y_true = y_test,
    y_pred = predicciones
)

accuracy = accuracy_score(
    y_true = y_test,
    y_pred = predicciones,
    normalize = True
)

print("Matriz de confusión")
print("-----")
print(mat_confusion)
print("")
print(f"El accuracy de test es: (100 + accuracy) %")

Matriz de confusión
-----
[[14  1]
 [ 0  9]]

El accuracy de test es: 95.63333333333334 %

/Users/gerard/opt/anaconda3/lib/python3.8/site-packages/ipykernel/ipkernel.py:287: DeprecationWarning: 'should_run_async' will not call 'transform_cell' automatically in the future. Please pass the result to 'transformed_cell' argument and any exception that happen during thetransform in 'preprocessing_exc_tuple' in IPython 7.17 and above.
  and should_run_async(code)
```

```
In [14]: import seaborn as sns
import matplotlib.pyplot as plt

ax = plt.subplot()
sns.heatmap(mat_confusion, annot=True, ax = ax, cmap=plt.cm.Reds); #annot=True to annotate cells

# Labels, title and ticks
ax.set_xlabel('Predicted labels');ax.set_ylabel('True labels');
ax.set_title('Confusion Matrix');
ax.xaxis.set_ticklabels(['Control', 'NoCov']); ax.yaxis.set_ticklabels(['Control', 'NoCov']);
plt.savefig('Matrix_NoCov_Control.pdf', format = 'pdf', dpi=300, transparent = True, bbox_inches='tight')
```

/Users/gerard/opt/anaconda3/lib/python3.8/site-packages/ipykernel/ipkernel.py:287: DeprecationWarning: 'should\_run\_async' will not call 'transform\_cell' automatically in the future. Please pass the result to 'transformed\_cell' argument and any exception that happen during thetransform in 'preprocessing\_exc\_tuple' in IPython 7.17 and above.

and should\_run\_async(code)

```
In [15]: # roc curve and auc score
from sklearn.datasets import make_classification
from sklearn.neighbors import KNeighborsClassifier
from sklearn.ensemble import RandomForestClassifier
from sklearn.model_selection import train_test_split
from sklearn.metrics import roc_curve
from sklearn.metrics import roc_auc_score

def plot_roc_curve(fpr, tpr):
    plt.plot(fpr, tpr, color='gold', label='ROC')
    plt.plot([0, 1], [0, 1], color='darkblue', linestyle='--')
    plt.xlabel('False Positive Rate')
    plt.ylabel('True Positive Rate')
    plt.title('Receiver Operating Characteristic (ROC) Curve')
    plt.legend()
    plt.savefig('AUC_Pl_NoCov_Control.pdf', format = 'pdf', dpi=300, transparent = True, bbox_inches='tight')
```

/Users/gerard/opt/anaconda3/lib/python3.8/site-packages/ipykernel/ipkernel.py:287: DeprecationWarning: 'should\_run\_async' will not call 'transform\_cell' automatically in the future. Please pass the result to 'transformed\_cell' argument and any exception that happen during thetransform in 'preprocessing\_exc\_tuple' in IPython 7.17 and above.

and should\_run\_async(code)

```
In [16]: probs = modelo_final.predict(X_test_prep)
```

```
In [17]: auc = roc_auc_score(y_test, probs)
print('AUC: %.2f' % auc)
```

AUC: 0.97

/Users/gerard/opt/anaconda3/lib/python3.8/site-packages/ipykernel/ipkernel.py:287: DeprecationWarning: 'should\_run\_async' will not call 'transform\_cell' automatically in the future. Please pass the result to 'transformed\_cell' argument and any exception that happen during thetransform in 'preprocessing\_exc\_tuple' in IPython 7.17 and above.

and should\_run\_async(code)

```
In [18]: fpr, tpr, thresholds = roc_curve(y_test, probs)

plot_roc_curve(fpr, tpr)
```

/Users/gerard/opt/anaconda3/lib/python3.8/site-packages/ipykernel/ipkernel.py:287: DeprecationWarning: 'should\_run\_async' will not call 'transform\_cell' automatically in the future. Please pass the result to 'transformed\_cell' argument and any exception that happen during thetransform in 'preprocessing\_exc\_tuple' in IPython 7.17 and above.

and should\_run\_async(code)

```
In [19]: # Probability prediction
# =====
predicciones = modelo_final.predict_proba(X = X_test_prep)
predicciones[:, 1]
```

/Users/gerard/opt/anaconda3/lib/python3.8/site-packages/ipykernel/ipkernel.py:287: DeprecationWarning: 'should\_run\_async' will not call 'transform\_cell' automatically in the future. Please pass the result to 'transformed\_cell' argument and any exception that happen during thetransform in 'preprocessing\_exc\_tuple' in IPython 7.17 and above.

and should\_run\_async(code)

```
Out[19]: array([[0.5904542, 0.4095458],
 [0.69212443, 0.30787557],
 [0.40948447, 0.59051553],
 [0.69191476, 0.30808524],
 [0.55836536, 0.44163464]])
```

```
In [20]: # Classification using the highest probability class
# =====
df_predicciones = pd.DataFrame(datos=predicciones, columns=['0', '1'])
df_predicciones['clasificacion_default_0.5'] = np.where(df_predicciones['1'] > df_predicciones['0'], 0, 1)
df_predicciones.head(3)
```

/Users/gerard/opt/anaconda3/lib/python3.8/site-packages/ipykernel/ipkernel.py:287: DeprecationWarning: 'should\_run\_async' will not call 'transform\_cell' automatically in the future. Please pass the result to 'transformed\_cell' argument and any exception that happen during thetransform in 'preprocessing\_exc\_tuple' in IPython 7.17 and above.

and should\_run\_async(code)

```
Out[20]:
```

|   | 0        | 1        | clasificacion_default_0.5 |
|---|----------|----------|---------------------------|
| 0 | 0.590454 | 0.409546 | 0                         |
| 1 | 0.692124 | 0.307876 | 0                         |
| 2 | 0.409484 | 0.590516 | 1                         |

```
In [21]: # Final classification using a threshold of 0.8 for class 1.
# =====
df_predicciones['clasificacion_custom_0.8'] = np.where(df_predicciones['1'] > 0.9, 1, 0)
df_predicciones[df_predicciones['clasificacion_custom_0.8']==df_predicciones['clasificacion_default_0.5']] \
    .head(3)
```

/Users/gerard/opt/anaconda3/lib/python3.8/site-packages/ipykernel/ipkernel.py:287: DeprecationWarning: 'should\_run\_async' will not call 'transform\_cell' automatically in the future. Please pass the result to 'transformed\_cell' argument and any exception that happen during thetransform in 'preprocessing\_exc\_tuple' in IPython 7.17 and above.

and should\_run\_async(code)

```
Out[21]:
```

|   | 0        | 1        | clasificacion_default_0.5 | clasificacion_custom_0.8 |
|---|----------|----------|---------------------------|--------------------------|
| 2 | 0.409484 | 0.590516 | 1                         | 0                        |
| 5 | 0.377248 | 0.622752 | 1                         | 0                        |
| 6 | 0.303227 | 0.696773 | 1                         | 0                        |

```
In [22]: importancia_predictores = pd.DataFrame(
    {
        'predictor': datos.drop(columns = "Group").columns,
        'importancia': modelo_final.feature_importances_
    }
)

print("Importancia de los predictores en el modelo")
print("-----")
importancia_predictores.sort_values('importancia', ascending=False)
```

Importancia de los predictores en el modelo

/Users/gerard/opt/anaconda3/lib/python3.8/site-packages/ipykernel/ipkernel.py:287: DeprecationWarning: 'should\_run\_async' will not call 'transform\_cell' automatically in the future. Please pass the result to 'transformed\_cell' argument and any exception that happen during thetransform in 'preprocessing\_exc\_tuple' in IPython 7.17 and above.

and should\_run\_async(code)

```
Out[22]:
```

|     | predictor               | importancia  |
|-----|-------------------------|--------------|
| 17  | Phosphoric acid         | 1.011511e-01 |
| 60  | d-Mannonic acid         | 7.771688e-02 |
| 30  | d-Threitol              | 6.685318e-02 |
| 34  | Erythronic acid         | 6.455771e-02 |
| 28  | Malic acid              | 5.631746e-02 |
| ... | ...                     | ...          |
| 53  | Citric acid             | 3.952965e-06 |
| 79  | Choline                 | 2.674726e-06 |
| 55  | Tetradecanoic acid      | 1.405692e-06 |
| 65  | Indole-3-propanoic acid | 1.288848e-06 |
| 57  | Vanillylmandelic acid   | 5.870208e-07 |

85 rows x 2 columns

```
In [23]: import shap
shap.initjs()
explainer = shap.TreeExplainer(modelo_final)
```

/Users/gerard/opt/anaconda3/lib/python3.8/site-packages/ipykernel/ipkernel.py:287: DeprecationWarning: 'should\_run\_async' will not call 'transform\_cell' automatically in the future. Please pass the result to 'transformed\_cell' argument and any exception that happen during thetransform in 'preprocessing\_exc\_tuple' in IPython 7.17 and above.

and should\_run\_async(code)

shap.\_\_version\_\_:219: RuntimeWarning: numpy.ufunc size changed, may indicate binary incompatibility. Expected 192 from C header, got 216 from Pyobject

Converting 'np.inexact' or 'np.floating' to a dtype is deprecated. The current result is 'float64' which is not strictly correct.

Setting feature\_perturbation = 'tree\_path\_dependent' because no background data was given.

The sklearn.ensemble.gradient\_boosting module is deprecated in version 0.22 and will be removed in version 0.24. The corresponding classes / functions should instead be imported from sklearn.ensemble. Anything that cannot be imported from sklearn.ensemble is now part of the private API.

```
In [26]: import numpy as np
import matplotlib as mpl
import matplotlib.pyplot as plt
from matplotlib import cm

from collections import OrderedDict

shap.summary_plot(shap_values, X_test, plot_type="bar", max_display= 5, show=False)
plt.savefig('SHAP_NoCov_Control.pdf', format = 'pdf', dpi=300, transparent = True, bbox_inches='tight')
```

```
In [25]: shap_values = explainer.shap_values(X_test, approximate=False, check_additivity=False)

shap.summary_plot(shap_values, X_test)
```

```
In [ ]:
```



```
In [1]: # Data treatment
import numpy as np
import pandas as pd
import statsmodels.api as sm

# Graphs
import matplotlib.pyplot as plt

# Processing and modeling
from sklearn.datasets import load_boston
from sklearn.ensemble import GradientBoostingClassifier
from sklearn.metrics import accuracy_score
from sklearn.metrics import confusion_matrix
from sklearn.compose import ColumnTransformer
from sklearn.preprocessing import OneHotEncoder
from sklearn.model_selection import cross_val_score
from sklearn.model_selection import train_test_split
from sklearn.model_selection import RepeatedKFold
from sklearn.model_selection import GridSearchCV
from sklearn.model_selection import ParameterGrid
from sklearn.inspection import permutation_importance
import multiprocessing

# Warnings configuration
import warnings
warnings.filterwarnings('once')
```

```
In [2]: datos = pd.read_csv("Covid_Nocovid_PL.csv")

/Users/gerard/opt/anaconda3/lib/python3.8/site-packages/ipykernel/ipkernel.py:287: DeprecationWarning: "should_run_async" will not call "transform_cell" automatically in the future. Please pass the result to "transformed_cell" argument and any exception that happen during thetransform in "preprocessing_exc_tuple" in IPython 7.17 and above, and should_run_async(code)
```

```
In [3]: # Division of data into train and test
# =====
X_train, X_test, y_train, y_test = train_test_split(
    datos.drop(columns = 'Group'),
    datos['Group'],
    random_state = 123
)

# One-hot-encoding of categorical variables
# =====
# The name of the numerical and categorical columns is identified
cat_cols = X_train.select_dtypes(include=['object', 'category']).columns.tolist()
numeric_cols = X_train.select_dtypes(include=['float64', 'int']).columns.tolist()

# One-hot-encoding is applied only to categorical columns
preprocessor = ColumnTransformer(
    [['onehot', OneHotEncoder(handle_unknown='ignore')], cat_cols]),
    remainder='passthrough'
)

# Once the ColumnTransformer object has been defined, with the fit() method
# method, the transformations are learned with the training data and are applied to
# the two sets with transform(). Both operations at the same time with fit_transform().
X_train_prep = preprocessor.fit_transform(X_train)
X_test_prep = preprocessor.transform(X_test)
```

```
In [4]: # Grid of evaluated hyperparameters
# =====
param_grid = {'n_estimators' : [50, 100, 500, 1000],
              'max_features' : ['auto', 'sqrt', 'log2'],
              'max_depth' : [None, 1, 3, 5, 10, 20],
              'subsample' : [0.5, 1],
              'learning_rate' : [0.001, 0.01, 0.1]
              }

# Grid search with cross validation
# =====
grid = GridSearchCV(
    estimator = GradientBoostingClassifier(random_state=123),
    param_grid = param_grid,
    scoring = 'accuracy',
    n_jobs = multiprocessing.cpu_count() - 1,
    cv = RepeatedKFold(n_splits=3, n_repeats=1, random_state=123),
    refit = True,
    verbose = 0,
    return_train_score = True
)

grid.fit(X = X_train_prep, y = y_train)

# Results
# =====
resultados = pd.DataFrame(grid.cv_results_)
resultados = resultados.filter(regex = '(param|mean_t[std_t])') \
    .drop(columns = 'params') \
    .sort_values('mean_test_score', ascending = False) \
    .head(4)
```

```
Out[4]:
```

|     | param_learning_rate | param_max_depth | param_max_features | param_n_estimators | param_subsample | mean_test_score | std_test_score | mean_train_score | std_train_score |
|-----|---------------------|-----------------|--------------------|--------------------|-----------------|-----------------|----------------|------------------|-----------------|
| 351 | 0.1                 | 3               | sqrt               | 1000               | 1               | 0.909350        | 0.043132       | 1.0              | 0.0             |
| 359 | 0.1                 | 3               | log2               | 1000               | 1               | 0.909350        | 0.043132       | 1.0              | 0.0             |
| 375 | 0.1                 | 5               | sqrt               | 1000               | 1               | 0.909146        | 0.062745       | 1.0              | 0.0             |
| 429 | 0.1                 | 20              | log2               | 500                | 1               | 0.901423        | 0.021171       | 1.0              | 0.0             |

```
Out[5]: # Better hyperparameters by cross-validation
# =====
print("-----")
print("Mejores hiperparámetros encontrados (cv)")
print("-----")
print(grid.best_params_, "+", grid.best_score_, grid.scoring)
```

```
-----
Mejores hiperparámetros encontrados (cv)
('learning_rate': 0.1, 'max_depth': 3, 'max_features': 'sqrt', 'n_estimators': 1000, 'subsample': 1) : 0.9093495934959349 accuracy

/Users/gerard/opt/anaconda3/lib/python3.8/site-packages/ipykernel/ipkernel.py:287: DeprecationWarning: "should_run_async" will not call "transform_cell" automatically in the future. Please pass the result to "transformed_cell" argument and any exception that happen during thetransform in "preprocessing_exc_tuple" in IPython 7.17 and above, and should_run_async(code)
```

```
In [6]: modelo_final = grid.best_estimator_

In [7]: # Final model test error
# =====
predicciones = modelo_final.predict(X = X_test_prep)
predicciones[10]
```

```
Out[7]: array([0, 1, 1, 0, 1, 1, 1, 0, 1, 0])

In [8]: mat_confusion = confusion_matrix(
    y_true = y_test,
    y_pred = predicciones
)

accuracy = accuracy_score(
    y_true = y_test,
    y_pred = predicciones,
    normalize = True
)

print("Matriz de confusión")
print("-----")
print(mat_confusion)
print("")
print(f"El accuracy de test es: {100 * accuracy} %")

Matriz de confusión
-----
[[ 9  2]
 [ 1 29]]

El accuracy de test es: 92.6929268292683 %

/Users/gerard/opt/anaconda3/lib/python3.8/site-packages/ipykernel/ipkernel.py:287: DeprecationWarning: "should_run_async" will not call "transform_cell" automatically in the future. Please pass the result to "transformed_cell" argument and any exception that happen during thetransform in "preprocessing_exc_tuple" in IPython 7.17 and above, and should_run_async(code)
```

```
In [9]: import seaborn as sns
import matplotlib.pyplot as plt

ax = plt.subplot()
sns.heatmap(mat_confusion, annot=True, ax = ax, cmap=plt.cm.Reds); #annot=True to annotate cells

# labels, title and ticks
ax.set_xlabel('Predicted labels');ax.set_ylabel('True labels');
ax.set_title('Confusion Matrix');
ax.xaxis.set_ticklabels(['No-Covid', 'Covid']); ax.yaxis.set_ticklabels(['No-Covid', 'Covid']);
plt.savefig('Matrix_PL_Cov_NoCov.pdf', format = 'pdf', dpi=300, transparent = True, bbox_inches='tight')
```

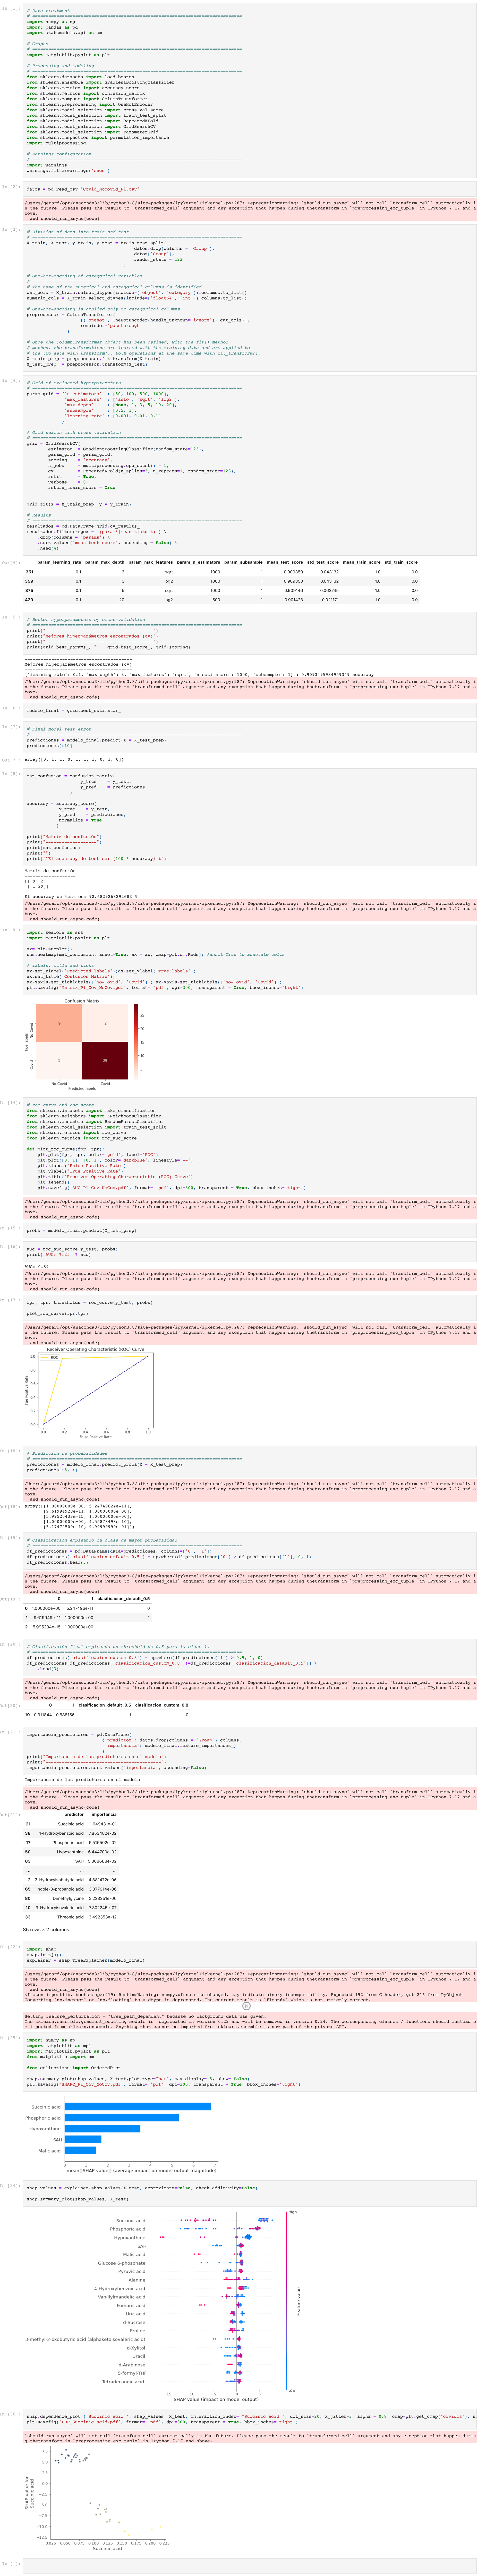

```
In [14]: # roc curve and auc score
from sklearn.datasets import make_classification
from sklearn.neighbors import KNeighborsClassifier
from sklearn.ensemble import RandomForestClassifier
from sklearn.model_selection import train_test_split
from sklearn.metrics import roc_curve
from sklearn.metrics import roc_auc_score

def plot_roc_curve(fpr, tpr):
    plt.plot(fpr, tpr, color='gold', label='ROC')
    plt.plot([0, 1], [0, 1], color='darkblue', linestyle='--')
    plt.xlabel('False Positive Rate')
    plt.ylabel('True Positive Rate')
    plt.title('Receiver Operating Characteristic (ROC) Curve')
    plt.legend()
    plt.savefig('AUC_PL_Cov_NoCov.pdf', format = 'pdf', dpi=300, transparent = True, bbox_inches='tight')
```

```
/Users/gerard/opt/anaconda3/lib/python3.8/site-packages/ipykernel/ipkernel.py:287: DeprecationWarning: "should_run_async" will not call "transform_cell" automatically in the future. Please pass the result to "transformed_cell" argument and any exception that happen during thetransform in "preprocessing_exc_tuple" in IPython 7.17 and above, and should_run_async(code)
```

```
In [15]: probs = modelo_final.predict(X_test_prep)

In [16]: auc = roc_auc_score(y_test, probs)
print("AUC: %.2f" % auc)

AUC: 0.89

/Users/gerard/opt/anaconda3/lib/python3.8/site-packages/ipykernel/ipkernel.py:287: DeprecationWarning: "should_run_async" will not call "transform_cell" automatically in the future. Please pass the result to "transformed_cell" argument and any exception that happen during thetransform in "preprocessing_exc_tuple" in IPython 7.17 and above, and should_run_async(code)
```

```
In [17]: fpr, tpr, thresholds = roc_curve(y_test, probs)
plot_roc_curve(fpr, tpr)
```



```
In [18]: # Predicción de probabilidades
# =====
predicciones = modelo_final.predict_proba(X = X_test_prep)
predicciones[15, :]
```

```
/Users/gerard/opt/anaconda3/lib/python3.8/site-packages/ipykernel/ipkernel.py:287: DeprecationWarning: "should_run_async" will not call "transform_cell" automatically in the future. Please pass the result to "transformed_cell" argument and any exception that happen during thetransform in "preprocessing_exc_tuple" in IPython 7.17 and above, and should_run_async(code)
```

```
Out[18]: array([[1.00000000e+00, 5.24749624e-11],
       [9.61994928e-11, 1.00000000e+00],
       [5.99520433e-15, 1.00000000e+00],
       [1.00000000e+00, 4.55878498e-10],
       [5.17425096e-10, 9.99999999e-01]])

In [19]: # Clasificación empleando la clase de mayor probabilidad
# =====
df_predicciones = pd.DataFrame(data=predicciones, columns=['0', '1'])
df_predicciones['clasificacion_default_0.5'] = np.where(df_predicciones['0'] > df_predicciones['1'], 0, 1)
df_predicciones.head(3)
```

```
/Users/gerard/opt/anaconda3/lib/python3.8/site-packages/ipykernel/ipkernel.py:287: DeprecationWarning: "should_run_async" will not call "transform_cell" automatically in the future. Please pass the result to "transformed_cell" argument and any exception that happen during thetransform in "preprocessing_exc_tuple" in IPython 7.17 and above, and should_run_async(code)
```

```
Out[19]:
```

|   | 0             | 1             | clasificacion_default_0.5 |
|---|---------------|---------------|---------------------------|
| 0 | 1.0000000e+00 | 5.247496e-11  | 0                         |
| 1 | 9.619949e-11  | 1.0000000e+00 | 1                         |
| 2 | 5.995204e-15  | 1.0000000e+00 | 1                         |

```
In [20]: # Clasificación final empleando un threshold de 0.8 para la clase 1.
# =====
df_predicciones = pd.DataFrame(data=predicciones, columns=['0', '1'])
df_predicciones['clasificacion_custom_0.8'] = np.where(df_predicciones['1'] > 0.9, 1, 0)
df_predicciones['clasificacion_custom_0.8'] = df_predicciones['clasificacion_default_0.5']
df_predicciones.head(3)
```

```
/Users/gerard/opt/anaconda3/lib/python3.8/site-packages/ipykernel/ipkernel.py:287: DeprecationWarning: "should_run_async" will not call "transform_cell" automatically in the future. Please pass the result to "transformed_cell" argument and any exception that happen during thetransform in "preprocessing_exc_tuple" in IPython 7.17 and above, and should_run_async(code)
```

```
Out[20]:
```

|    | 0        | 1        | clasificacion_default_0.5 | clasificacion_custom_0.8 |
|----|----------|----------|---------------------------|--------------------------|
| 19 | 0.311844 | 0.688156 | 1                         | 0                        |

```
In [21]: importancia_predictores = pd.DataFrame(
    {'predictor': datos.drop(columns = 'Group').columns,
     'importancia': modelo_final.feature_importances_
    })

print("Importancia de los predictores en el modelo")
print("-----")
importancia_predictores.sort_values('importancia', ascending=False)
```

```
Importancia de los predictores en el modelo
-----
predictor      importancia
21  Succinic acid  1.649431e-01
38  4-Hydroxybenzoic acid  7.853482e-02
17  Phosphoric acid  6.516502e-02
50  Hypoxanthine  6.444700e-02
83  SAH  5.808688e-02
...      ...      ...
6  2-Hydroxyisobutyric acid  4.881472e-06
65  Indole-3-propanoic acid  3.877914e-06
80  Dimethylglycine  3.223251e-06
10  3-Hydroxyisovaleric acid  7.302245e-07
33  Threonic acid  3.492353e-12
```

85 rows x 2 columns

```
In [22]: import shap
shap.initjs()
explainer = shap.TreeExplainer(modelo_final)

/Users/gerard/opt/anaconda3/lib/python3.8/site-packages/ipykernel/ipkernel.py:287: DeprecationWarning: "should_run_async" will not call "transform_cell" automatically in the future. Please pass the result to "transformed_cell" argument and any exception that happen during thetransform in "preprocessing_exc_tuple" in IPython 7.17 and above, and should_run_async(code)
<FrozenImportlib.bootstrap>:219: RuntimeWarning: numpy.ufunc size changed, may indicate binary incompatibility. Expected 192 from C header, got 216 from PyObject
Converting 'np.inexact' or 'np.floating' to a dtype is deprecated. The current result is 'float64' which is not strictly correct.
```

Imported feature perturbation = "tree\_path\_dependent" because no background data was given.  
The sklearn.ensemble.gradient\_boosting module is deprecated in version 0.22 and will be removed in version 0.24. The corresponding classes / functions should instead be imported from sklearn.ensemble. Anything that cannot be imported from sklearn.ensemble is now part of the private API.

```
In [25]: import numpy as np
import matplotlib as mpl
import matplotlib.pyplot as plt
from matplotlib import cm

from collections import OrderedDict

shap.summary_plot(shap_values, X_test, plot_type="bar", max_display= 5, show= False)
plt.savefig('SHAP_PL_Cov_NoCov.pdf', format = 'pdf', dpi=300, transparent = True, bbox_inches='tight')
```



```
In [24]: shap_values = explainer.shap_values(X_test, approximate=False, check_additivity=False)
shap.summary_plot(shap_values, X_test)
```



```
In [26]: shap.dependence_plot('Succinic acid', shap_values, X_test, interaction_index= 'Succinic acid ', dot_size=20, x_jitter=3, alpha = 0.8, cmap=plt.get_cmap('cividis'),
plt.savefig('PDF_Succinic acid.pdf', format = 'pdf', dpi=300, transparent = True, bbox_inches='tight')
```

"should\_run\_async" will not call "transform\_cell" automatically in the future. Please pass the result to "transformed\_cell" argument and any exception that happen during thetransform in "preprocessing\_exc\_tuple" in IPython 7.17 and above.



```
In [ ]:
```



```
In [1]: # Data treatment
import numpy as np
import pandas as pd
import statsmodels.api as sm

# Graphs
import matplotlib.pyplot as plt

# Processing and modeling
from sklearn.datasets import load_boston
from sklearn.ensemble import GradientBoostingClassifier
from sklearn.metrics import accuracy_score
from sklearn.metrics import confusion_matrix
from sklearn.compose import ColumnTransformer
from sklearn.preprocessing import OneHotEncoder
from sklearn.model_selection import cross_val_score
from sklearn.model_selection import train_test_split
from sklearn.model_selection import RepeatedKFold
from sklearn.model_selection import GridSearchCV
from sklearn.model_selection import ParameterGrid
from sklearn.inspection import permutation_importance
import multiprocessing

# Warnings configuration
import warnings
warnings.filterwarnings('once')
```

```
In [2]: datos = pd.read_csv('Urine_Cov_NoCov.csv')
```

```
/Users/gerard/opt/anaconda3/lib/python3.8/site-packages/ipykernel/ipkernel.py:287: DeprecationWarning: "should_run_async" will not call "transform_cell" automatically in the future. Please pass the result to "transformed_cell" argument and any exception that happen during thetransform in "preprocessing_exc_tuple" in IPython 7.17 and above.
    and should_run_async(code)
```

```
In [3]: # Division of data into train and test
# =====
X_train, X_test, y_train, y_test = train_test_split(
    datos.drop(columns = 'Group'),
    datos['Group'],
    random_state = 123
)

# One-hot-encoding of categorical variables
# The name of the numerical and categorical columns is identified
cat_cols = X_train.select_dtypes(include=['object', 'category']).columns.tolist()
numeric_cols = X_train.select_dtypes(include=['float64', 'int']).columns.tolist()

# One-hot-encoding is applied only to categorical columns
preprocessor = ColumnTransformer(
    [(['onehot', OneHotEncoder(handle_unknown='ignore'), cat_cols)],
     remainder='passthrough'
    ]
)

# Once the ColumnTransformer object has been defined, with the fit() method
# method, the transformations are learned with the training data and are applied to
# the two sets with transform(). Both operations at the same time with fit_transform().
X_train_prep = preprocessor.fit_transform(X_train)
X_test_prep = preprocessor.transform(X_test)
```

```
In [4]: # Grid of evaluated hyperparameters
# =====
param_grid = {'n_estimators' : [50, 100, 500, 1000],
              'max_features' : ['auto', 'sqrt', 'log2'],
              'max_depth' : [None, 1, 3, 5, 10, 20],
              'subsample' : [0.5, 1],
              'learning_rate' : [0.001, 0.01, 0.1]
             }

# Grid search with cross validation
# =====
grid = GridSearchCV(
    estimator = GradientBoostingClassifier(random_state=123),
    param_grid = param_grid,
    scoring = 'accuracy',
    n_jobs = multiprocessing.cpu_count() - 1,
    cv = RepeatedKFold(n_splits=3, n_repeats=1, random_state=123),
    refit = True,
    verbose = 0,
    return_train_score = True
)

grid.fit(X = X_train_prep, y = y_train)

# Results
resultados = pd.DataFrame(grid.cv_results_)
resultados.filter(regex = '(param*mean_t[std_t]) \\'
                    .drop(columns = 'params') \\'
                    .sort_values('mean_test_score', ascending = False) \\'
                    .head(4))
```

```
Out[4]:
```

|     | param_learning_rate | param_max_depth | param_max_features | param_n_estimators | param_subsample | mean_test_score | std_test_score | mean_train_score | std_train_score |
|-----|---------------------|-----------------|--------------------|--------------------|-----------------|-----------------|----------------|------------------|-----------------|
| 351 | 0.1                 | 3               | sqrt               | 1000               | 1               | 0.796748        | 0.011498       | 1.0              | 0.0             |
| 327 | 0.1                 | 1               | sqrt               | 1000               | 1               | 0.796748        | 0.011498       | 1.0              | 0.0             |
| 349 | 0.1                 | 3               | sqrt               | 500                | 1               | 0.788618        | 0.022995       | 1.0              | 0.0             |
| 301 | 0.1                 | None            | sqrt               | 500                | 1               | 0.788618        | 0.011498       | 1.0              | 0.0             |

```
Out[4]:
```

```
In [5]: # Better hyperparameters by cross-validation
# =====
print("-----")
print("Mejores hiperparámetros encontrados (cv)")
print("-----")
print(grid.best_params_, "!", grid.best_score_, grid.scoring)

-----
Mejores hiperparámetros encontrados (cv)
('learning_rate': 0.1, 'max_depth': 1, 'max_features': 'sqrt', 'n_estimators': 1000, 'subsample': 1) : 0.7967479674796749 accuracy
```

```
/Users/gerard/opt/anaconda3/lib/python3.8/site-packages/ipykernel/ipkernel.py:287: DeprecationWarning: "should_run_async" will not call "transform_cell" automatically in the future. Please pass the result to "transformed_cell" argument and any exception that happen during thetransform in "preprocessing_exc_tuple" in IPython 7.17 and above.
    and should_run_async(code)
```

```
In [6]: modelo_final = grid.best_estimator_
```

```
In [7]: # Final model test error
# =====
predicciones = modelo_final.predict(X = X_test_prep)
predicciones[10]
```

```
Out[7]: array([1, 1, 1, 1, 1, 1, 1, 1, 1, 1])
```

```
In [8]: mat_confusion = confusion_matrix(
    y_true = y_test,
    y_pred = predicciones
)

accuracy = accuracy_score(
    y_true = y_test,
    y_pred = predicciones,
    normalize = True
)

print("Matriz de confusión")
print("-----")
print(mat_confusion)
print("")
print(f"El accuracy de test es: (100 * accuracy) %")
```

```
Matriz de confusión
[[ 4 11]
 [ 4 23]]

El accuracy de test es: 64.28571428571429 %
```

```
/Users/gerard/opt/anaconda3/lib/python3.8/site-packages/ipykernel/ipkernel.py:287: DeprecationWarning: "should_run_async" will not call "transform_cell" automatically in the future. Please pass the result to "transformed_cell" argument and any exception that happen during thetransform in "preprocessing_exc_tuple" in IPython 7.17 and above.
    and should_run_async(code)
```

```
In [9]: import seaborn as sns
import matplotlib.pyplot as plt

sns = plt.subplot()
sns.heatmap(mat_confusion, annot=True, ax = ax, cmap=plt.cm.Red3); #annot=True to annotate cells

# labels, title and ticks
ax.set_xlabel('Predicted labels');ax.set_ylabel('True labels');
ax.set_title('Confusion Matrix');
ax.xaxis.set_ticklabels(['NoCov', 'Covid']); ax.yaxis.set_ticklabels(['NoCov', 'Covid']);
plt.savefig('Matrix_Urine_Cov_NoCov.pdf', format = 'pdf', dpi=300, transparent = True, bbox_inches='tight')
```

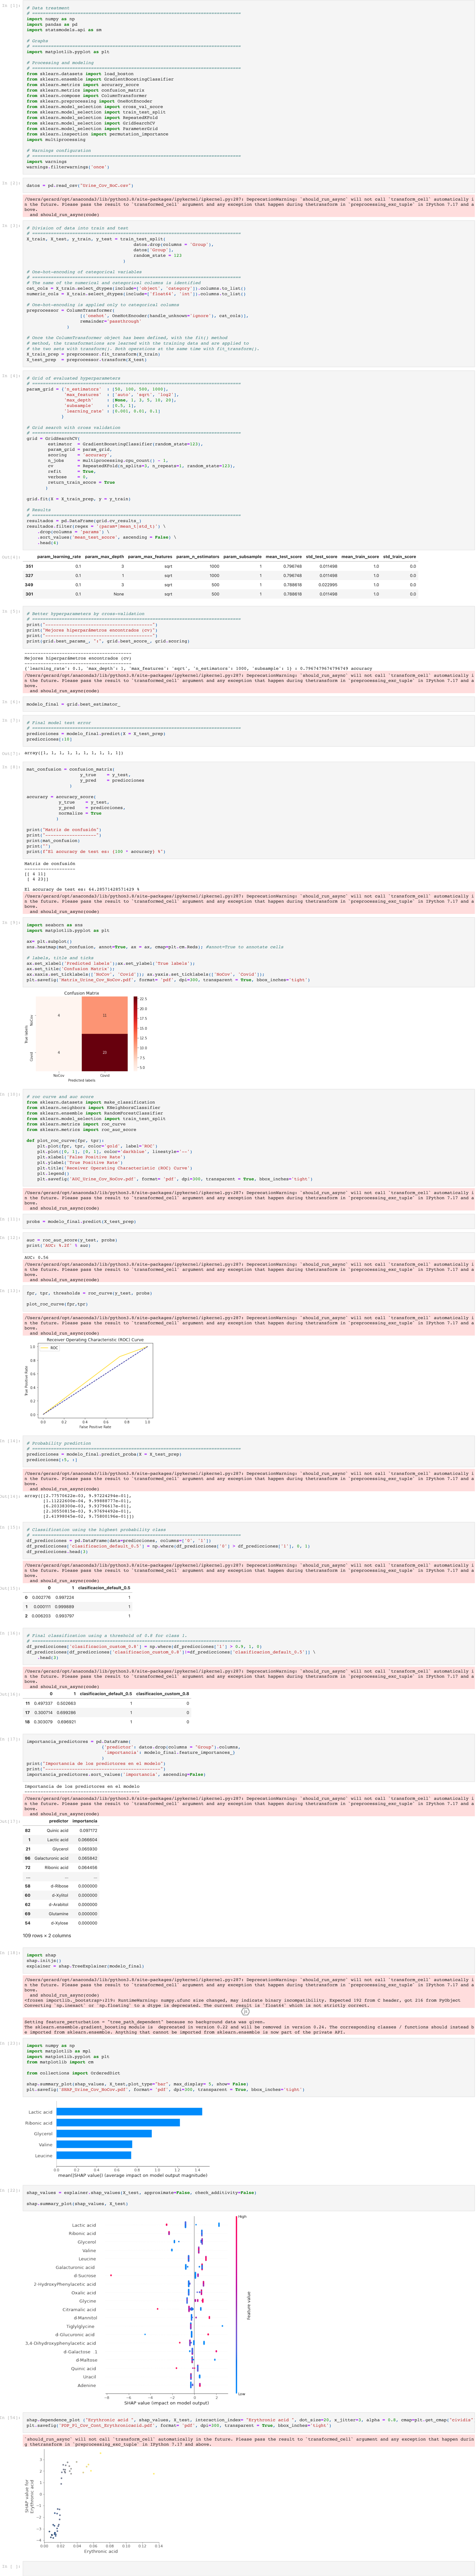

```
In [10]: # roc curve and auc score
from sklearn.datasets import make_classification
from sklearn.neighbors import KNeighborsClassifier
from sklearn.ensemble import RandomForestClassifier
from sklearn.model_selection import train_test_split
from sklearn.metrics import roc_curve
from sklearn.metrics import roc_auc_score

def plot_roc_curve(fpr, tpr):
    plt.plot(fpr, tpr, color='gold', label='ROC')
    plt.plot([0, 1], [0, 1], color='darkblue', linestyle='--')
    plt.xlabel('False Positive Rate')
    plt.ylabel('True Positive Rate')
    plt.title('Receiver Operating Characteristic (ROC) Curve')
    plt.legend()
    plt.savefig('AUC_Urine_Cov_NoCov.pdf', format = 'pdf', dpi=300, transparent = True, bbox_inches='tight')
```

```
/Users/gerard/opt/anaconda3/lib/python3.8/site-packages/ipykernel/ipkernel.py:287: DeprecationWarning: "should_run_async" will not call "transform_cell" automatically in the future. Please pass the result to "transformed_cell" argument and any exception that happen during thetransform in "preprocessing_exc_tuple" in IPython 7.17 and above.
    and should_run_async(code)
```

```
In [11]: probs = modelo_final.predict(X_test_prep)
```

```
In [12]: auc = roc_auc_score(y_test, probs)
print(" AUC: %.2f" % auc)
```

```
AUC: 0.56
```

```
/Users/gerard/opt/anaconda3/lib/python3.8/site-packages/ipykernel/ipkernel.py:287: DeprecationWarning: "should_run_async" will not call "transform_cell" automatically in the future. Please pass the result to "transformed_cell" argument and any exception that happen during thetransform in "preprocessing_exc_tuple" in IPython 7.17 and above.
    and should_run_async(code)
```

```
In [13]: fpr, tpr, thresholds = roc_curve(y_test, probs)
plot_roc_curve(fpr, tpr)
```

```
/Users/gerard/opt/anaconda3/lib/python3.8/site-packages/ipykernel/ipkernel.py:287: DeprecationWarning: "should_run_async" will not call "transform_cell" automatically in the future. Please pass the result to "transformed_cell" argument and any exception that happen during thetransform in "preprocessing_exc_tuple" in IPython 7.17 and above.
    and should_run_async(code)
```



```
In [14]: # Probability prediction
# =====
predicciones = modelo_final.predict_proba(X = X_test_prep)
predicciones[5, :]
```

```
/Users/gerard/opt/anaconda3/lib/python3.8/site-packages/ipykernel/ipkernel.py:287: DeprecationWarning: "should_run_async" will not call "transform_cell" automatically in the future. Please pass the result to "transformed_cell" argument and any exception that happen during thetransform in "preprocessing_exc_tuple" in IPython 7.17 and above.
    and should_run_async(code)
```

```
Out[14]: array([[2.77570622e-03, 9.97224294e-01],
                [1.1222600e-04, 9.9988777e-01],
                [6.20338300e-03, 9.93796617e-01],
                [5.30550815e-03, 9.97694492e-01],
                [2.41998045e-02, 9.75800196e-01]])
```

```
In [15]: # Classification using the highest probability class
# =====
df_predicciones = pd.DataFrame(data=predicciones, columns=['0', '1'])
df_predicciones['clasificacion_default_0.5'] = np.where(df_predicciones['0'] > df_predicciones['1'], 0, 1)
df_predicciones.head(3)
```

```
/Users/gerard/opt/anaconda3/lib/python3.8/site-packages/ipykernel/ipkernel.py:287: DeprecationWarning: "should_run_async" will not call "transform_cell" automatically in the future. Please pass the result to "transformed_cell" argument and any exception that happen during thetransform in "preprocessing_exc_tuple" in IPython 7.17 and above.
    and should_run_async(code)
```

```
Out[15]:
```

|   | 0        | 1        | clasificacion_default_0.5 |
|---|----------|----------|---------------------------|
| 0 | 0.002776 | 0.997224 | 1                         |
| 1 | 0.000111 | 0.999889 | 1                         |
| 2 | 0.006203 | 0.993797 | 1                         |

```
In [16]: # Final classification using a threshold of 0.8 for class 1.
# =====
df_predicciones['clasificacion_custom_0.8'] = np.where(df_predicciones['1'] > 0.9, 1, 0)
df_predicciones['clasificacion_custom_0.8'] = df_predicciones['clasificacion_default_0.5'] \
    .head(3)
```

```
/Users/gerard/opt/anaconda3/lib/python3.8/site-packages/ipykernel/ipkernel.py:287: DeprecationWarning: "should_run_async" will not call "transform_cell" automatically in the future. Please pass the result to "transformed_cell" argument and any exception that happen during thetransform in "preprocessing_exc_tuple" in IPython 7.17 and above.
    and should_run_async(code)
```

```
Out[16]:
```

|    | 0        | 1        | clasificacion_default_0.5 | clasificacion_custom_0.8 |
|----|----------|----------|---------------------------|--------------------------|
| 11 | 0.497337 | 0.502663 | 1                         | 0                        |
| 21 | 0.300714 | 0.699286 | 1                         | 0                        |
| 18 | 0.303079 | 0.696921 | 1                         | 0                        |

```
In [17]: importancia_predictores = pd.DataFrame(
    {'predictor': datos.drop(columns = 'Group').columns,
     'importancia': modelo_final.feature_importances_
    })

print("Importancia de los predictores en el modelo")
print("-----")
importancia_predictores.sort_values('importancia', ascending=False)
```

```
/Users/gerard/opt/anaconda3/lib/python3.8/site-packages/ipykernel/ipkernel.py:287: DeprecationWarning: "should_run_async" will not call "transform_cell" automatically in the future. Please pass the result to "transformed_cell" argument and any exception that happen during thetransform in "preprocessing_exc_tuple" in IPython 7.17 and above.
    and should_run_async(code)
```

```
Out[17]:
```

|     | predictor         | importancia |
|-----|-------------------|-------------|
| 82  | Quinic acid       | 0.097172    |
| 1   | Lactic acid       | 0.066604    |
| 21  | Glycerol          | 0.065930    |
| 96  | Galacturonic acid | 0.065842    |
| 72  | Ribonic acid      | 0.064456    |
| ... | ...               | ...         |
| 58  | d-Ribose          | 0.000000    |
| 60  | d-Xylitol         | 0.000000    |
| 62  | d-Arabitol        | 0.000000    |
| 69  | Glutamine         | 0.000000    |
| 54  | d-Xylose          | 0.000000    |

109 rows x 2 columns

```
In [18]: import shap
shap.initjs()
explainer = shap.TreeExplainer(modelo_final)
```

```
/Users/gerard/opt/anaconda3/lib/python3.8/site-packages/ipykernel/ipkernel.py:287: DeprecationWarning: "should_run_async" will not call "transform_cell" automatically in the future. Please pass the result to "transformed_cell" argument and any exception that happen during thetransform in "preprocessing_exc_tuple" in IPython 7.17 and above.
    and should_run_async(code)
```

```
<frozen importlib._bootstrap>:1219: RuntimeWarning: numpy.ufunc size changed, may indicate binary incompatibility. Expected 192 from C header, got 216 from PyObject
Converting 'np.inexact' or 'np.floating' to a dtype is deprecated. The current result is 'float64' which is not strictly correct.
```

Setting feature\_perturbation = "tree\_path\_dependent" because no background data was given.  
The sklearn.ensemble.gradient\_boosting module is deprecated in version 0.22 and will be removed in version 0.24. The corresponding classes / functions should instead be imported from sklearn.ensemble. Anything that cannot be imported from sklearn.ensemble is now part of the private API.

```
In [23]: import numpy as np
import pandas as mpl
import matplotlib.pyplot as plt
from matplotlib import cm

from collections import OrderedDict

shap.summary_plot(shap_values, X_test, plot_type='bar', max_display= 5, show= False)
plt.savefig('SHAP_Urine_Cov_NoCov.pdf', format='pdf', dpi=300, transparent = True, bbox_inches='tight')
```



```
In [22]: shap_values = explainer.shap_values(X_test, approximate=False, check_additivity=False)
shap.summary_plot(shap_values, X_test)
```



```
In [54]: shap.dependence_plot("Erythronic acid", shap_values, X_test, interaction_index = "Erythronic acid", dot_size=20, x_jitter=3, alpha = 0.8, cmap=plt.get_cmap("cividis"))
plt.savefig('PDF_Urine_Cov_NoCov_ErythronicAcid.pdf', format='pdf', dpi=300, transparent = True, bbox_inches='tight')
```

```
should_run_async will not call "transform_cell" automatically in the future. Please pass the result to "transformed_cell" argument and any exception that happen during thetransform in "preprocessing_exc_tuple" in IPython 7.17 and above.
```



```
In [ ]:
```



**Supplementary Table S3.** Serum metabolites from healthy volunteers and COVID-19 positive patients

| Metabolites<br>(Molar %)                           | Control<br>(n = 50)      | Covid-19<br>(n = 126)    | log <sub>2</sub> FC<br>(Covid-19 vs<br>Control) | p-value  | q-value  |
|----------------------------------------------------|--------------------------|--------------------------|-------------------------------------------------|----------|----------|
| <b>Amino acid metabolism</b>                       |                          |                          |                                                 |          |          |
| <b>Alanine &amp; aspartate metabolism</b>          |                          |                          |                                                 |          |          |
| Alanine                                            | 5.1 (4.8 - 5.8)          | 4.6 (4.0 - 5.3)          | -0.22                                           | 6.01E-05 | 2.26E-04 |
| Glutamic acid                                      | 1.2 (9.4E-1 - 1.5)       | 2.0 (1.4 - 2.7)          | 0.83                                            | 1.00E-10 | 1.18E-09 |
| <b>Arginine &amp; proline metabolism</b>           |                          |                          |                                                 |          |          |
| 4-Hydroxyproline                                   | 1.6E-1 (1.2E-1 - 1.9E-1) | 1.4E-1 (8.1E-2 - 2.0E-1) | -0.20                                           | 3.2E-02  | 6.5E-02  |
| Ornithine                                          | 1.8 (1.6 - 2.2)          | 2.0 (1.5 - 2.4)          | 0.02                                            | 4.9E-01  | 6.0E-01  |
| Oxoproline                                         | 7.0 (6.1 - 8.5)          | 7.8 (6.3 - 9.2)          | 0.10                                            | 8.3E-02  | 1.4E-01  |
| Proline                                            | 3.3 (2.7 - 3.8)          | 2.7 (2.0 - 3.4)          | -0.28                                           | 7.9E-04  | 2.3E-03  |
| <b>Cysteine &amp; methionine metabolism</b>        |                          |                          |                                                 |          |          |
| 5-formyl-THF                                       | 4.0E-4 (2.9E-4 - 5.6E-4) | 1.2E-3 (6.9E-4 - 1.9E-3) | 1.52                                            | 8.1E-13  | 1.5E-11  |
| 5-methyl-THF                                       | 3.7E-3 (2.6E-3 - 5.4E-3) | 2.5E-3 (1.6E-3 - 4.2E-3) | -0.25                                           | 1.8E-03  | 5.0E-03  |
| Betaine                                            | 54 (45 - 60)             | 40 (29 - 47)             | -0.37                                           | 3.5E-07  | 2.0E-06  |
| Homocysteine                                       | 11 (7.9 - 13)            | 14 (9.8 - 18)            | 0.26                                            | 5.6E-04  | 1.7E-03  |
| Methionine                                         | 4.5E-1 (4.1E-1 - 5.1E-1) | 3.9E-1 (3.1E-1 - 4.7E-1) | -0.24                                           | 4.0E-04  | 1.3E-03  |
| SAH                                                | 4.8E-2 (4.1E-2 - 5.5E-2) | 7.9E-2 (6.0E-2 - 1.3E-1) | 1.09                                            | 8.4E-14  | 2.0E-12  |
| SAM                                                | 1.5E-1 (1.1E-1 - 1.7E-1) | 2.5E-1 (1.6E-1 - 3.6E-1) | 1.19                                            | 1.5E-08  | 1.1E-07  |
| <b>Glycine &amp; serine metabolism</b>             |                          |                          |                                                 |          |          |
| Dimethylglycine                                    | 3.3 (3.0 - 3.6)          | 3.1 (2.7 - 3.5)          | -0.01                                           | 1.6E-01  | 2.5E-01  |
| Glyceric acid                                      | 2.3 (2.0 - 2.6)          | 2.2 (1.8 - 2.5)          | -0.92                                           | 6.8E-19  | 8.3E-17  |
| Glycine                                            | 2.3E-1 (2.0E-1 - 2.6E-1) | 1.1E-1 (9.0E-2 - 1.5E-1) | -0.12                                           | 5.5E-02  | 9.9E-02  |
| Serine                                             | 2.4 (1.9 - 2.7)          | 1.8 (1.3 - 2.5)          | -0.09                                           | 2.1E-01  | 3.0E-01  |
| Threonine                                          | 5.8 (4.6 - 6.5)          | 4.7 (3.7 - 6.7)          | -0.27                                           | 6.8E-04  | 2.1E-03  |
| <b>Phenylalanine metabolism</b>                    |                          |                          |                                                 |          |          |
| Benzoic acid                                       | 3.8E-2 (3.2E-2 - 4.4E-2) | 3.7E-2 (3.0E-2 - 4.6E-2) | -0.02                                           | 5.7E-01  | 6.6E-01  |
| Hippuric acid                                      | 1.3E-1 (7.0E-2 - 2.3E-1) | 3.3E-2 (1.4E-2 - 8.4E-2) | 0.36                                            | 1.2E-06  | 6.7E-06  |
| Hydrocinnamic acid                                 | 5.3E-3 (1.6E-3 - 8.8E-3) | 9.1E-4 (2.7E-4 - 2.0E-3) | -2.39                                           | 2.2E-12  | 3.5E-11  |
| Phenylalanine                                      | 1.2 (1.1 - 1.3)          | 1.5 (1.2 - 1.9)          | -1.20                                           | 5.2E-10  | 4.7E-09  |
| <b>Tryptophan metabolism</b>                       |                          |                          |                                                 |          |          |
| Indole-3-propanoic acid                            | 4.0E-3 (2.6E-3 - 6.3E-3) | 6.7E-4 (1.7E-4 - 1.6E-3) | -1.79                                           | 2.1E-15  | 9.5E-14  |
| Indolelactic acid                                  | 1.2E-2 (9.1E-3 - 1.5E-2) | 1.0E-2 (6.6E-3 - 1.3E-2) | 0                                               | 1.6E-02  | 3.5E-02  |
| <b>Tyrosine metabolism</b>                         |                          |                          |                                                 |          |          |
| Vanillylmandelic acid                              | 1.0E-3 (6.4E-4 - 1.3E-3) | 1.1E-3 (8.1E-4 - 1.7E-3) | 0.55                                            | 1.9E-02  | 4.1E-02  |
| <b>Valine, leucine &amp; isoleucine metabolism</b> |                          |                          |                                                 |          |          |
| 2-HydroxyButyric acid                              | 5.0E-1 (4.3E-1 - 6.5E-1) | 9.3E-1 (6.2E-1 - 1.3)    | 1.06                                            | 1.7E-01  | 2.6E-01  |
| 2-Hydroxyisobutyric acid                           | 3.8E-2 (3.3E-2 - 4.4E-2) | 6.4E-2 (4.8E-2 - 1.0E-1) | 1                                               | 4.0E-09  | 3.3E-08  |
| 2-Hydroxyisovaleric acid                           | 1.4E-1 (1.0E-1 - 1.7E-1) | 2.1E-1 (1.3E-1 - 4.1E-1) | 1.20                                            | 7.3E-06  | 3.3E-05  |
| 2-keto-3-methylvaleric acid                        | 5.0E-2 (4.3E-2 - 5.5E-2) | 3.2E-2 (2.6E-2 - 4.1E-2) | -0.63                                           | 4.4E-15  | 1.6E-13  |
| 3-hydroxybutyric acid/3-hydroxyisobutyric acid     | 3.4E-1 (2.6E-1 - 5.5E-1) | 4.0E-1 (2.6E-1 - 1.0)    | -0.41                                           | 7.4E-09  | 5.6E-08  |
| 3-Hydroxyisovaleric acid                           | 3.7E-2 (2.8E-2 - 4.3E-2) | 5.3E-2 (3.4E-2 - 8.9E-2) | 0.94                                            | 5.2E-06  | 2.4E-05  |
| 3-methyl-2-oxobutyric acid                         | 1.4E-2 (1.2E-2 - 1.6E-2) | 1.1E-2 (8.4E-3 - 1.3E-2) | 0.83                                            | 2.4E-10  | 2.4E-09  |
| Isoleucine                                         | 1.2 (1.0 - 1.4)          | 1.1 (9.4E-1 - 1.3)       | -0.13                                           | 9.8E-02  | 1.6E-01  |
| Leucine                                            | 2.3 (2.1 - 2.6)          | 2.2 (1.8 - 2.5)          | -0.14                                           | 2.1E-02  | 4.3E-02  |
| Valine                                             | 3.8 (3.4 - 4.0)          | 3.3 (2.9 - 3.7)          | -0.21                                           | 4.0E-05  | 1.6E-04  |
| <b>Carbohydrate metabolism</b>                     |                          |                          |                                                 |          |          |
| <b>Ascorbate and aldrate metabolism</b>            |                          |                          |                                                 |          |          |

|                                                       |                          |                          |       |         |         |
|-------------------------------------------------------|--------------------------|--------------------------|-------|---------|---------|
| Saccharic acid                                        | 2.4E-2 (1.8E-2 - 3.1E-2) | 5.3E-2 (3.3E-2 - 9.7E-2) | 4.28  | 6.9E-13 | 1.3E-11 |
| <b>C5-Branched dibasic acid metabolism</b>            |                          |                          |       |         |         |
| DL-2-Hydroxyglutaric acid                             | 1.5E-2 (1.3E-2 - 1.8E-2) | 2.1E-2 (1.7E-2 - 2.6E-2) | 0.50  | 8.3E-09 | 6.2E-08 |
| <b>Fructose &amp; mannose metabolism</b>              |                          |                          |       |         |         |
| d-Fructose                                            | 1.4E-1 (1.3E-1 - 1.7E-1) | 1.7E-1 (1.3E-1 - 2.6E-1) | 0.91  | 5.4E-03 | 1.3E-02 |
| d-Mannitol                                            | 1.4 (1.3 - 1.8)          | 9.8E-1 (2.8E-1 - 1.3)    | -0.67 | 3.1E-07 | 1.8E-06 |
| d-Mannonic acid                                       | 5.7E-1 (4.6E-1 - 7.1E-1) | 3.4 (1.3 - 9.5)          | 3.99  | 2.7E-21 | 9.9E-19 |
| <b>Galactose metabolism</b>                           |                          |                          |       |         |         |
| d-Galactitol                                          | 9.4E-3 (6.3E-3 - 1.2E-2) | 9.4E-3 (6.0E-3 - 1.6E-2) | 0.55  | 6.6E-01 | 7.4E-01 |
| <b>Glycolysis</b>                                     |                          |                          |       |         |         |
| Lactic acid                                           | 17 (16 - 19)             | 17 (14 - 19)             | -0.09 | 1.3E-01 | 2.1E-01 |
| 3-Phosphoglyceric acid                                | 1.6E-3 (1.2E-3 - 2.0E-3) | 1.4E-3 (9.2E-4 - 2.0E-3) | -0.15 | 1.4E-01 | 2.2E-01 |
| Glucose 6-phosphate                                   | 2.1E-3 (1.8E-3 - 2.3E-3) | 2.6E-3 (2.1E-3 - 3.2E-3) | 0.46  | 2.5E-06 | 1.3E-05 |
| <b>Glyxolate and decarboxylate metabolism</b>         |                          |                          |       |         |         |
| Glycolic acid                                         | 9.0E-2 (8.3E-2 - 1.0E-1) | 8.4E-2 (6.9E-2 - 1.0E-1) | -0.07 | 2.6E-02 | 5.4E-02 |
| <b>Nucleotide sugar metabolism</b>                    |                          |                          |       |         |         |
| d-Arabinose                                           | 2.1E-2 (1.8E-2 - 2.8E-2) | 3.4E-2 (2.6E-2 - 4.7E-2) | 1.04  | 3.1E-10 | 2.9E-09 |
| d-Threitol                                            | 1.7E-2 (1.5E-2 - 1.9E-2) | 2.5E-2 (2.0E-2 - 3.2E-2) | 0.79  | 3.8E-13 | 7.7E-12 |
| d-Xylose                                              | 1.7E-2 (1.5E-2 - 2.0E-2) | 2.2E-2 (1.8E-2 - 3.6E-2) | 0.78  | 1.2E-07 | 7.5E-07 |
| Erythronic acid                                       | 1.3E-2 (1.2E-2 - 1.6E-2) | 2.9E-2 (2.0E-2 - 5.2E-2) | 1.60  | 4.8E-16 | 2.5E-14 |
| Threonic acid                                         | 2.0E-1 (1.9E-1 - 2.4E-1) | 3.8E-1 (2.9E-1 - 5.9E-1) | 1.25  | 3.0E-17 | 1.8E-15 |
| Xylonic acid                                          | 2.7E-2 (2.3E-2 - 3.1E-2) | 4.2E-2 (3.0E-2 - 6.1E-2) | 0.90  | 1.7E-10 | 1.9E-09 |
| <b>Pentose glucuronate interconversion metabolism</b> |                          |                          |       |         |         |
| d-Arabitol                                            | 5.0E-3 (4.3E-3 - 6.6E-3) | 9.0E-3 (7.1E-3 - 1.4E-2) | 1.13  | 3.4E-14 | 9.6E-13 |
| d-Xylitol                                             | 9.7E-4 (8.4E-4 - 1.1E-3) | 2.0E-3 (1.5E-3 - 4.5E-3) | 2.21  | 9.0E-20 | 1.6E-17 |
| Galactonic acid                                       | 1.5E-2 (5.0E-3 - 1.8E-2) | 2.7E-2 (1.2E-2 - 4.5E-2) | 4.02  | 4.3E-05 | 1.7E-04 |
| Galacturonic acid                                     | 2.7E-2 (2.3E-2 - 3.1E-2) | 8.4E-2 (4.8E-2 - 1.7E-1) | 2.66  | 1.4E-17 | 1.0E-15 |
| myo-Inositol                                          | 3.4E-1 (2.9E-1 - 3.8E-1) | 4.1E-1 (2.9E-1 - 5.8E-1) | 0.41  | 7.1E-03 | 1.7E-02 |
| <b>Pentose phosphate metabolism</b>                   |                          |                          |       |         |         |
| Sedoheptulose                                         | 3.3E-2 (2.6E-2 - 4.2E-2) | 4.8E-2 (3.6E-2 - 6.4E-2) | 0.57  | 1.1E-07 | 6.4E-07 |
| <b>Sucrose metabolism</b>                             |                          |                          |       |         |         |
| d-Sucrose                                             | 6.0E-3 (4.1E-3 - 7.7E-3) | 8.1E-3 (5.4E-3 - 2.0E-2) | 1.77  | 3.5E-04 | 1.2E-03 |
| Maltose                                               | 6.1E-3 (5.3E-3 - 7.0E-3) | 1.4E-2 (1.0E-2 - 2.2E-2) | 1.78  | 1.7E-18 | 1.5E-16 |
| <b>Tricarboxylic acid cycle metabolism</b>            |                          |                          |       |         |         |
| alpha-ketoglutaric acid                               | 3.9E-2 (3.2E-2 - 4.5E-2) | 7.3E-2 (5.4E-2 - 1.0E-1) | 1.07  | 1.4E-13 | 3.2E-12 |
| Citric acid                                           | 2.0 (1.6 - 2.4)          | 1.8 (1.2 - 2.7)          | -0.04 | 1.4E-01 | 2.2E-01 |
| Fumaric acid                                          | 9.6E-3 (7.9E-3 - 1.1E-2) | 1.0E-2 (7.6E-3 - 1.3E-2) | 0.15  | 2.3E-01 | 3.2E-01 |
| Glutamine                                             | 14 (12E - 16)            | 9.7 (5.8 - 14)           | -0.52 | 8.5E-08 | 5.3E-07 |
| Malic acid                                            | 3.1E-2 (2.8E-2 - 3.6E-2) | 4.1E-2 (3.1E-2 - 5.4E-2) | 0.48  | 2.8E-06 | 1.4E-05 |
| Pyruvic acid                                          | 7.5E-1 (5.4E-1 - 1.1)    | 9.2E-1 (6.5E-1 - 1.3)    | 0.30  | 1.7E-02 | 3.5E-02 |
| Succinic acid                                         | 8.4E-2 (7.5E-2 - 9.9E-2) | 7.6E-2 (6.0E-2 - 9.1E-2) | -0.14 | 1.3E-02 | 2.8E-02 |
| <b>Energy metabolism</b>                              |                          |                          |       |         |         |
| <b>Methane metabolism</b>                             |                          |                          |       |         |         |
| TMAO                                                  | 7.1 (5.1 - 14)           | 18 (7.8 - 30)            | 0.63  | 2.9E-04 | 9.7E-04 |
| <b>Oxidative phosphorylation</b>                      |                          |                          |       |         |         |
| Phosphoric acid                                       | 5.9 (5.1 - 6.8)          | 4.2 (3.5 - 5.4)          | -0.46 | 5.3E-09 | 4.1E-08 |
| <b>Lipid metabolism</b>                               |                          |                          |       |         |         |
| <b>Glycerolipid metabolism</b>                        |                          |                          |       |         |         |
| Choline                                               | 18 (16 - 21)             | 19 (16 - 25)             | 0.11  | 2.4E-01 | 3.3E-01 |
| Ethanolamine                                          | 9.5E-2 (9.0E-2 - 1.0E-1) | 8.6E-2 (6.9E-2 - 1.1E-1) | -0.09 | 3.2E-03 | 8.1E-03 |
| Glycerol                                              | 1.2 (9.7E-1 - 1.8)       | 8.0E-1 (5.5E-1 - 1.2)    | -0.50 | 9.0E-08 | 5.5E-07 |
| Glycerol-1-phosphate                                  | 3.4E-2 (2.7E-2 - 4.1E-2) | 2.7E-2 (2.0E-2 - 3.5E-2) | -0.27 | 2.9E-04 | 9.7E-04 |
| <b>Lipids</b>                                         |                          |                          |       |         |         |
| Dodecanoic acid                                       | 8.3E-2 (6.5E-2 - 1.1E-1) | 6.3E-2 (4.8E-2 - 8.0E-2) | -0.69 | 4.0E-06 | 1.9E-05 |



|                                       |                          |                          |       |         |         |
|---------------------------------------|--------------------------|--------------------------|-------|---------|---------|
| Linoleic acid                         | 4.6E-1 (3.0E-1 - 6.1E-1) | 3.4E-1 (1.9E-1 - 6.1E-1) | -0.13 | 6.1E-02 | 1.1E-01 |
| Oleic acid                            | 2.5 (1.5 - 3.6)          | 3.1 (1.8 - 4.7)          | 0.32  | 5.6E-02 | 1.0E-01 |
| Tetradecanoic acid                    | 2.6E-1 (2.3E-1 - 3.2E-1) | 2.4E-1 (1.9E-1 - 3.1E-1) | -0.23 | 6.4E-02 | 1.1E-01 |
| <b>Primary bile acid biosynthesis</b> |                          |                          |       |         |         |
| Taurine                               | 3.1 (2.6 - 4.3)          | 2.7 (1.7 - 4.4)          | -0.20 | 8.5E-02 | 1.4E-01 |
| <b>Metabolism of cofactors</b>        |                          |                          |       |         |         |
| <b>Cofactor biosynthesis</b>          |                          |                          |       |         |         |
| alpha-tocopherol                      | 3.6E-2 (3.0E-2 - 5.6E-2) | 1.4E-2 (7.4E-3 - 2.4E-2) | -1.19 | 1.8E-12 | 3.2E-11 |
| <b>Nucleotide metabolism</b>          |                          |                          |       |         |         |
| <b>Purine &amp; pyrimidine</b>        |                          |                          |       |         |         |
| Ethylmalonic acid                     | 1.1 (9.5E-1 - 1.5)       | 7.5E-1 (5.2E-1 - 9.7E-1) | -0.55 | 2.2E-10 | 2.2E-09 |
| Hypoxanthine                          | 4.0E-2 (2.8E-2 - 4.7E-2) | 4.9E-2 (3.1E-2 - 8.4E-2) | 0.70  | 9.0E-03 | 2.1E-02 |
| Ribonic acid                          | 7.6E-3 (6.1E-3 - 8.9E-3) | 1.3E-2 (7.6E-3 - 2.1E-2) | 1.03  | 2.8E-06 | 1.4E-05 |
| Uracil                                | 1.6E-3 (1.3E-3 - 2.0E-3) | 2.2E-3 (1.7E-3 - 2.8E-3) | 0.59  | 3.6E-06 | 1.7E-05 |
| Uric acid                             | 6.6 (5.2 - 9.8)          | 4.7 (2.8 - 7.6)          | -0.51 | 7.7E-05 | 2.8E-04 |
| <b>Xenobiotic metabolism</b>          |                          |                          |       |         |         |
| <b>Benzoate degradation</b>           |                          |                          |       |         |         |
| 4-Hydroxybenzoic acid                 | 2.1E-2 (2.4E-3 - 2.3E-2) | 1.7E-2 (1.2E-2 - 2.1E-2) | 0.13  | 6.9E-01 | 7.6E-01 |

Results are shown as the molar percentage of total metabolites. Median  $\pm$  interquartile range (25 – 75) was calculated, and statistical significance was assessed with Wilcoxon rank-sum test and false-discovery rate (FDR  $q < 0.05$ ) correction by the Benjamini-Hochberg method. SAH, s-adenosylhomocysteine; SAM, s-adenosylmethionine; THF, tetrahydrofolate; TMAO, trimethylamine N-oxide.



**Supplementary Table S4.** Serum metabolites from healthy volunteers and COVID-19 negative patients

| Metabolites<br>(Molar %)                           | Control<br>(n = 50)      | No-Covid-19<br>(n = 45)  | log <sub>2</sub> FC<br>(No-Covid-19<br>vs Control) | p-value | q-value  |
|----------------------------------------------------|--------------------------|--------------------------|----------------------------------------------------|---------|----------|
| <b>Amino acid metabolism</b>                       |                          |                          |                                                    |         |          |
| <b>Alanine &amp; aspartate metabolism</b>          |                          |                          |                                                    |         |          |
| Alanine                                            | 5.1 (4.8 - 5.8)          | 5.6 (5.0 - 6.1)          | 0.09                                               | 4.2E-02 | 8.09E-02 |
| Glutamic acid                                      | 1.2 (9.4E-1 - 1.5)       | 2.1 (1.7 - 2.6)          | 0.93                                               | 2.8E-10 | 2.68E-09 |
| <b>Arginine &amp; proline metabolism</b>           |                          |                          |                                                    |         |          |
| 4-Hydroxyproline                                   | 1.6E-1 (1.2E-1 - 1.9E-1) | 1.6E-1 (1.2E-1 - 2.1E-1) | -0.08                                              | 9.9E-01 | 9.91E-01 |
| Ornithine                                          | 1.8 (1.6 - 2.2)          | 2.1 (1.6 - 2.7)          | 0.14                                               | 2.3E-01 | 3.20E-01 |
| Oxoproline                                         | 7.0 (6.1 - 8.5)          | 7.5 (6.7 - 8.6)          | 0.07                                               | 2.3E-01 | 3.28E-01 |
| Proline                                            | 3.3 (2.7 - 3.8)          | 3.3 (2.8 - 4.0)          | 0.09                                               | 4.8E-01 | 5.90E-01 |
| <b>Cysteine &amp; methionine metabolism</b>        |                          |                          |                                                    |         |          |
| 5-formyl-THF                                       | 4.0E-4 (2.9E-4 - 5.6E-4) | 6.4E-4 (4.5E-4 - 1.0E-3) | 0.59                                               | 4.7E-05 | 1.82E-04 |
| 5-methyl-THF                                       | 3.7E-3 (2.6E-3 - 5.4E-3) | 2.2E-3 (1.0E-3 - 3.4E-3) | -0.67                                              | 2.3E-04 | 7.95E-04 |
| Betaine                                            | 54 (45 - 60)             | 40 (28 - 51)             | -0.32                                              | 3.9E-04 | 1.27E-03 |
| Homocysteine                                       | 11 (7.9 - 13)            | 14 (11 - 18)             | 0.34                                               | 8.6E-04 | 2.50E-03 |
| Methionine                                         | 4.5E-1 (4.1E-1 - 5.1E-1) | 4.1E-1 (3.4E-1 - 5.0E-1) | -0.12                                              | 4.4E-02 | 8.26E-02 |
| SAH                                                | 4.8E-2 (4.1E-2 - 5.5E-2) | 5.4E-2 (4.3E-2 - 7.4E-2) | 0.35                                               | 4.7E-02 | 8.73E-02 |
| SAM                                                | 1.5E-1 (1.1E-1 - 1.7E-1) | 1.6E-1 (1.3E-1 - 2.5E-1) | 0.43                                               | 3.6E-02 | 7.17E-02 |
| <b>Glycine &amp; serine metabolism</b>             |                          |                          |                                                    |         |          |
| Dimethylglycine                                    | 5.8 (4.6 - 6.5)          | 4.9 (3.9 - 6.5)          | -0.24                                              | 1.6E-03 | 4.48E-03 |
| Glyceric acid                                      | 2.3E-1 (2.0E-1 - 2.6E-1) | 1.5E-1 (1.0E-1 - 1.9E-1) | -0.01                                              | 7.5E-01 | 8.13E-01 |
| Glycine                                            | 3.3 (3.0 - 3.6)          | 3.3 (2.9 - 3.6)          | -0.08                                              | 2.6E-01 | 3.53E-01 |
| Serine                                             | 2.3 (2.0 - 2.6)          | 2.3 (2.1 - 2.7)          | -0.58                                              | 1.8E-08 | 1.28E-07 |
| Threonine                                          | 2.4 (1.9 - 2.7)          | 1.8 (1.7 - 2.3)          | 0.04                                               | 4.0E-01 | 5.13E-01 |
| <b>Phenylalanine metabolism</b>                    |                          |                          |                                                    |         |          |
| Benzoic acid                                       | 3.8E-2 (3.2E-2 - 4.4E-2) | 3.9E-2 (3.0E-2 - 5.3E-2) | 0.09                                               | 8.1E-01 | 8.62E-01 |
| Hippuric acid                                      | 1.3E-1 (7.0E-2 - 2.3E-1) | 9.4E-2 (4.4E-2 - 1.9E-1) | 0.32                                               | 5.7E-06 | 2.61E-05 |
| hydrocinnamic acid                                 | 5.3E-3 (1.6E-3 - 8.8E-3) | 1.2E-3 (3.8E-4 - 2.2E-3) | -1.86                                              | 1.3E-06 | 7.02E-06 |
| Phenylalanine                                      | 1.2 (1.1 - 1.3)          | 1.5 (1.2 - 1.7)          | -0.08                                              | 8.7E-02 | 1.46E-01 |
| <b>Tryptophan metabolism</b>                       |                          |                          |                                                    |         |          |
| Indole-3-propanoic acid                            | 4.0E-3 (2.6E-3 - 6.3E-3) | 1.7E-3 (3.2E-4 - 3.3E-3) | -1.17                                              | 1.4E-06 | 7.34E-06 |
| Indolelactic acid                                  | 1.2E-2 (9.1E-3 - 1.5E-2) | 1.1E-2 (7.0E-3 - 1.5E-2) | 0.02                                               | 4.2E-01 | 5.29E-01 |
| <b>Tyrosine metabolism</b>                         |                          |                          |                                                    |         |          |
| Vanillylmandelic acid                              | 1.0E-3 (6.4E-4 - 1.3E-3) | 1.7E-3 (1.3E-3 - 2.3E-3) | 0.90                                               | 1.3E-06 | 7.18E-06 |
| <b>Valine, leucine &amp; isoleucine metabolism</b> |                          |                          |                                                    |         |          |
| 2-HydroxyButyric acid                              | 5.0E-1 (4.3E-1 - 6.5E-1) | 7.1E-1 (5.4E-1 - 1.0)    | 0.48                                               | 2.1E-01 | 3.00E-01 |
| 2-Hydroxyisobutyric acid                           | 3.8E-2 (3.3E-2 - 4.4E-2) | 5.7E-2 (5.0E-2 - 1.3E-1) | 0.55                                               | 1.1E-03 | 3.24E-03 |
| 2-Hydroxyisovaleric acid                           | 1.4E-1 (1.0E-1 - 1.7E-1) | 1.8E-1 (1.2E-1 - 2.7E-1) | 0.66                                               | 2.6E-03 | 6.85E-03 |
| 2-keto-3-methylvaleric acid                        | 5.0E-2 (4.3E-2 - 5.5E-2) | 3.2E-2 (2.3E-2 - 4.3E-2) | -0.64                                              | 8.4E-10 | 7.42E-09 |
| 3-hydroxybutyric acid/3-hydroxyisobutyric acid     | 3.4E-1 (2.6E-1 - 5.5E-1) | 4.3E-1 (2.9E-1 - 7.1E-1) | -0.52                                              | 6.9E-08 | 4.43E-07 |
| 3-Hydroxyisovaleric acid                           | 3.7E-2 (2.8E-2 - 4.3E-2) | 3.9E-2 (3.2E-2 - 5.5E-2) | 0.29                                               | 1.2E-01 | 1.95E-01 |
| 3-methyl-2-oxobutyric acid                         | 1.4E-2 (1.2E-2 - 1.6E-2) | 1.0E-2 (7.2E-3 - 1.3E-2) | 1.09                                               | 3.7E-08 | 2.50E-07 |
| Isoleucine                                         | 1.2 (1.0 - 1.4)          | 1.1 (9.4E-1 - 1.3)       | -0.07                                              | 3.1E-01 | 4.07E-01 |
| Leucine                                            | 2.3 (2.1 - 2.6)          | 2.1 (1.8 - 2.4)          | -0.13                                              | 6.4E-03 | 1.54E-02 |
| Valine                                             | 3.8 (3.4 - 4.0)          | 3.3 (2.9 - 3.7)          | -0.16                                              | 4.2E-04 | 1.33E-03 |
| <b>Carbohydrate metabolism</b>                     |                          |                          |                                                    |         |          |
| <b>Ascorbate and aldrate metabolism</b>            |                          |                          |                                                    |         |          |



|                                                       |                          |                          |       |         |          |
|-------------------------------------------------------|--------------------------|--------------------------|-------|---------|----------|
| Saccharic acid                                        | 2.4E-2 (1.8E-2 - 3.1E-2) | 5.1E-2 (3.9E-2 - 7.8E-2) | 1.33  | 2.6E-11 | 3.51E-10 |
| <b>C5-Branched dibasic acid metabolisim</b>           |                          |                          |       |         |          |
| DL-2-Hydroxyglutaric acid                             | 1.5E-2 (1.3E-2 - 1.8E-2) | 2.1E-2 (1.7E-2 - 2.4E-2) | 0.46  | 2.9E-07 | 1.69E-06 |
| <b>Fructose &amp; mannose metabolism</b>              |                          |                          |       |         |          |
| d-Fructose                                            | 1.4E-1 (1.3E-1 - 1.7E-1) | 2.1E-1 (1.3E-1 - 3.8E-1) | 0.70  | 1.0E-03 | 2.86E-03 |
| d-Mannitol                                            | 1.4 (1.3 - 1.8)          | 1.2 (1.6E-1 - 2.4)       | -0.42 | 4.6E-03 | 1.14E-02 |
| d-Mannonic acid                                       | 5.7E-1 (4.6E-1 - 7.1E-1) | 1.8 (1.1 - 2.8)          | 2.24  | 3.0E-14 | 9.06E-13 |
| <b>Galactose metabolism</b>                           |                          |                          |       |         |          |
| d-Galactitol                                          | 9.4E-3 (6.3E-3 - 1.2E-2) | 1.2E-2 (7.5E-3 - 1.6E-2) | 0.22  | 1.4E-01 | 2.22E-01 |
| <b>Glycolysis</b>                                     |                          |                          |       |         |          |
| 3-Phosphoglyceric acid                                | 1.6E-3 (1.2E-3 - 2.0E-3) | 1.8E-3 (1.2E-3 - 2.4E-3) | 0.18  | 2.0E-01 | 2.88E-01 |
| Glucose 6-phosphate                                   | 2.1E-3 (1.8E-3 - 2.3E-3) | 2.1E-3 (1.6E-3 - 2.9E-3) | 0.17  | 8.7E-01 | 9.01E-01 |
| Lactic acid                                           | 17 (16 - 19)             | 19 (17 - 22)             | 0.15  | 2.4E-03 | 6.41E-03 |
| <b>Glyxolate and decarboxylate metabolism</b>         |                          |                          |       |         |          |
| Glycolic acid                                         | 9.0E-2 (8.3E-2 - 1.0E-1) | 8.5E-2 (7.1E-2 - 9.5E-2) | -0.16 | 3.3E-02 | 6.54E-02 |
| <b>Nucleotide sugar metabolism</b>                    |                          |                          |       |         |          |
| d-Arabinose                                           | 2.1E-2 (1.8E-2 - 2.8E-2) | 4.1E-2 (3.1E-2 - 6.6E-2) | 1.08  | 1.7E-10 | 1.90E-09 |
| d-Threitol                                            | 1.7E-2 (1.5E-2 - 1.9E-2) | 3.3E-2 (2.5E-2 - 3.9E-2) | 1.18  | 7.9E-14 | 2.04E-12 |
| d-Xylose                                              | 1.7E-2 (1.5E-2 - 2.0E-2) | 3.0E-2 (2.2E-2 - 3.7E-2) | 0.96  | 4.8E-09 | 3.78E-08 |
| Erythronic acid                                       | 1.3E-2 (1.2E-2 - 1.6E-2) | 3.1E-2 (2.2E-2 - 4.5E-2) | 1.49  | 1.9E-12 | 3.18E-11 |
| Threonic acid                                         | 2.0E-1 (1.9E-1 - 2.4E-1) | 4.4E-1 (3.2E-1 - 5.5E-1) | 1.31  | 2.3E-13 | 4.91E-12 |
| Xylonic acid                                          | 2.7E-2 (2.3E-2 - 3.1E-2) | 4.8E-2 (3.7E-2 - 6.4E-2) | 1.01  | 7.5E-11 | 9.39E-10 |
| <b>Pentose glucoronate interconversion metabolism</b> |                          |                          |       |         |          |
| d-Arabitol                                            | 5.0E-3 (4.3E-3 - 6.6E-3) | 9.9E-3 (8.4E-3 - 1.4E-2) | 1.21  | 8.4E-12 | 1.18E-10 |
| d-Xylitol                                             | 9.7E-4 (8.4E-4 - 1.1E-3) | 1.4E-3 (1.0E-3 - 2.0E-3) | 0.83  | 5.0E-07 | 2.78E-06 |
| Galactonic acid                                       | 1.5E-2 (5.0E-3 - 1.8E-2) | 2.7E-2 (1.1E-2 - 4.8E-2) | 1.46  | 7.0E-05 | 2.59E-04 |
| Galacturonic acid                                     | 2.7E-2 (2.3E-2 - 3.1E-2) | 6.0E-2 (3.9E-2 - 9.0E-2) | 1.41  | 1.0E-10 | 1.18E-09 |
| myo-Inositol                                          | 3.4E-1 (2.9E-1 - 3.8E-1) | 5.0E-1 (3.8E-1 - 6.0E-1) | 0.72  | 3.5E-08 | 2.44E-07 |
| <b>Pentose phosphate metabolism</b>                   |                          |                          |       |         |          |
| Sedoheptulose                                         | 3.3E-2 (2.6E-2 - 4.2E-2) | 6.5E-2 (4.3E-2 - 1.0E-1) | 1.14  | 1.8E-09 | 1.56E-08 |
| <b>Sucrose metabolism</b>                             |                          |                          |       |         |          |
| d-Sucrose                                             | 6.0E-3 (4.1E-3 - 7.7E-3) | 1.6E-2 (1.0E-2 - 3.4E-2) | 3.01  | 6.2E-12 | 9.34E-11 |
| Maltose                                               | 6.1E-3 (5.3E-3 - 7.0E-3) | 1.2E-2 (9.8E-3 - 1.8E-2) | 1.31  | 6.8E-12 | 9.96E-11 |
| <b>Tricarboxylic acid cycle metabolism</b>            |                          |                          |       |         |          |
| alpha-ketoglutaric acid                               | 3.9E-2 (3.2E-2 - 4.5E-2) | 5.9E-2 (4.7E-2 - 9.5E-2) | 1.07  | 2.8E-06 | 1.38E-05 |
| Citric acid                                           | 2.0 (1.6 - 2.4)          | 2.4 (1.8 - 3.6)          | 0.37  | 1.4E-02 | 3.06E-02 |
| Fumaric acid                                          | 9.6E-3 (7.9E-3 - 1.1E-2) | 1.4E-2 (1.1E-2 - 1.7E-2) | 0.69  | 2.9E-08 | 2.01E-07 |
| Glutamine                                             | 14 (12E - 16)            | 11 (7.4 - 14)            | -0.41 | 4.9E-04 | 1.53E-03 |
| Malic acid                                            | 3.1E-2 (2.8E-2 - 3.6E-2) | 5.6E-2 (4.5E-2 - 7.9E-2) | 1.10  | 3.2E-11 | 4.15E-10 |
| Pyruvic acid                                          | 7.5E-1 (5.4E-1 - 1.1)    | 6.9E-1 (4.8E-1 - 1.0)    | -0.03 | 6.0E-01 | 6.92E-01 |
| Succinic acid                                         | 8.4E-2 (7.5E-2 - 9.9E-2) | 1.3E-1 (1.1E-1 - 1.6E-1) | 0.65  | 2.0E-10 | 2.08E-09 |
| <b>Energy metabolism</b>                              |                          |                          |       |         |          |
| <b>Methane metabolism</b>                             |                          |                          |       |         |          |
| TMAO                                                  | 7.1 (5.1 - 14)           | 16 (7.7 - 27)            | 0.56  | 6.8E-03 | 1.60E-02 |
| <b>Oxidative phosphorylation</b>                      |                          |                          |       |         |          |
| Phosphoric acid                                       | 5.9 (5.1 - 6.8)          | 2.6 (2.1 - 3.4)          | -1.11 | 7.8E-15 | 2.59E-13 |
| <b>Lipid metabolism</b>                               |                          |                          |       |         |          |
| <b>Glycerolipid metabolism</b>                        |                          |                          |       |         |          |
| Choline                                               | 18 (16 - 21)             | 18 (16 - 21)             | 0.05  | 7.7E-01 | 8.21E-01 |
| Ethanolamine                                          | 9.5E-2 (9.0E-2 - 1.0E-1) | 1.0E-1 (8.7E-2 - 1.3E-1) | 0.24  | 4.5E-02 | 8.36E-02 |
| Glycerol                                              | 1.2 (9.7E-1 - 1.8)       | 9.0E-1 (6.8E-1 - 1.4)    | -0.26 | 4.1E-03 | 1.03E-02 |
| Glycerol-1-phosphate                                  | 3.4E-2 (2.7E-2 - 4.1E-2) | 3.4E-2 (2.7E-2 - 4.3E-2) | 0.12  | 7.6E-01 | 8.15E-01 |
| <b>Lipids</b>                                         |                          |                          |       |         |          |
| Dodecanoic acid                                       | 8.3E-2 (6.5E-2 - 1.1E-1) | 6.1E-2 (4.8E-2 - 7.3E-2) | -0.70 | 5.6E-05 | 2.15E-04 |
| Linoleic acid                                         | 4.6E-1 (3.0E-1 - 6.1E-1) | 2.9E-1 (1.6E-1 - 4.4E-1) | -0.59 | 7.2E-04 | 2.16E-03 |



|                                       |                          |                          |       |         |          |
|---------------------------------------|--------------------------|--------------------------|-------|---------|----------|
| Oleic acid                            | 2.5 (1.5 - 3.6)          | 2.0 (1.1 - 4.1)          | -0.01 | 6.7E-01 | 7.46E-01 |
| Tetradecanoic acid                    | 2.6E-1 (2.3E-1 - 3.2E-1) | 2.2E-1 (1.7E-1 - 2.7E-1) | -0.37 | 1.3E-03 | 3.76E-03 |
| <b>Primary bile acid biosynthesis</b> |                          |                          |       |         |          |
| Taurine                               | 3.1 (2.6 - 4.3)          | 3.3 (2.5 - 4.9)          | 0.02  | 7.5E-01 | 8.10E-01 |
| <b>Metabolism of cofactors</b>        |                          |                          |       |         |          |
| <b>Cofactor biosynthesis</b>          |                          |                          |       |         |          |
| alpha-tocopherol                      | 3.6E-2 (3.0E-2 - 5.6E-2) | 1.1E-2 (5.9E-3 - 2.0E-2) | -1.43 | 1.8E-10 | 1.94E-09 |
| <b>Nucleotide metabolism</b>          |                          |                          |       |         |          |
| <b>Purine &amp; pyrimidine</b>        |                          |                          |       |         |          |
| Ethylmalonic acid                     | 1.1 (9.5E-1 - 1.5)       | 7.7E-1 (6.3E-1 - 1.1)    | -0.42 | 2.6E-05 | 1.07E-04 |
| Hypoxanthine                          | 4.0E-2 (2.8E-2 - 4.7E-2) | 1.2E-1 (4.6E-2 - 2.7E-1) | 2.11  | 6.9E-08 | 4.43E-07 |
| Ribonic acid                          | 7.6E-3 (6.1E-3 - 8.9E-3) | 1.4E-2 (1.1E-2 - 2.4E-2) | 1.25  | 9.6E-10 | 8.33E-09 |
| Uracil                                | 1.6E-3 (1.3E-3 - 2.0E-3) | 1.7E-3 (1.2E-3 - 2.0E-3) | 0.09  | 1.0E+00 | 9.99E-01 |
| Uric acid                             | 6.6 (5.2 - 9.8)          | 7.5 (5.2 - 9.6)          | -0.02 | 9.1E-01 | 9.26E-01 |
| <b>Xenobiotic metabolism</b>          |                          |                          |       |         |          |
| <b>Benzoate degradation</b>           |                          |                          |       |         |          |
| 4-Hydroxybenzoic acid                 | 2.1E-2 (2.4E-3 - 2.3E-2) | 2.2E-2 (1.8E-2 - 2.7E-2) | 0.78  | 1.3E-02 | 2.78E-02 |

Results are shown as the molar percentage of total metabolites. Median  $\pm$  interquartile range (25 – 75) was calculated, and statistical significance was assessed with Wilcoxon rank-sum test and false-discovery rate (FDR  $q < 0.05$ ) correction by the Benjamini-Hochberg method. SAH, s-adenosylhomocysteine; SAM, s-adenosylmethionine; THF, tetrahydrofolate; TMAO, trimethylamine N-oxide.



**Supplementary Table S5.** Serum metabolites from COVID-19 positive and negative patients

| Metabolites<br>(Molar %)                           | Covid-19<br>(n = 126)    | No-Covid-19<br>(n = 45)  | log <sub>2</sub> FC (Covid-19 vs No-Covid-19) | p-value | q-value |
|----------------------------------------------------|--------------------------|--------------------------|-----------------------------------------------|---------|---------|
| <b>Amino acid metabolism</b>                       |                          |                          |                                               |         |         |
| <b>Alanine &amp; aspartate metabolism</b>          |                          |                          |                                               |         |         |
| Alanine                                            | 4.6 (4.0 - 5.3)          | 5.6 (5.0 - 6.1)          | -0.31                                         | 4.4E-08 | 2.9E-07 |
| Glutamic acid                                      | 2.0 (1.4 - 2.7)          | 2.1 (1.7 - 2.6)          | -0.10                                         | 4.6E-01 | 5.7E-01 |
| <b>Arginine &amp; proline metabolism</b>           |                          |                          |                                               |         |         |
| 4-Hydroxyproline                                   | 1.4E-1 (8.1E-2 - 2.0E-1) | 1.6E-1 (1.2E-1 - 2.1E-1) | -0.11                                         | 5.4E-02 | 9.8E-02 |
| Ornithine                                          | 2.0 (1.5 - 2.4)          | 2.1 (1.6 - 2.7)          | -0.12                                         | 4.1E-01 | 5.2E-01 |
| Oxoproline                                         | 7.8 (6.3 - 9.2)          | 7.5 (6.7 - 8.6)          | 0.03                                          | 6.3E-01 | 7.1E-01 |
| Proline                                            | 2.7 (2.0 - 3.4)          | 3.3 (2.8 - 4.0)          | -0.37                                         | 1.1E-04 | 3.7E-04 |
| <b>Cysteine &amp; methionine metabolism</b>        |                          |                          |                                               |         |         |
| 5-formyl-THF                                       | 1.2E-3 (6.9E-4 - 1.9E-3) | 6.4E-4 (4.5E-4 - 1.0E-3) | 0.93                                          | 4.4E-05 | 1.8E-04 |
| 5-methyl-THF                                       | 2.5E-3 (1.6E-3 - 4.2E-3) | 2.2E-3 (1.0E-3 - 3.4E-3) | 0.42                                          | 1.4E-01 | 2.2E-01 |
| Betaine                                            | 40 (29 - 47)             | 40 (28 - 51)             | -0.05                                         | 6.4E-01 | 7.2E-01 |
| Homocysteine                                       | 14 (9.8 - 18)            | 14 (11 - 18)             | -0.09                                         | 3.9E-01 | 5.1E-01 |
| Methionine                                         | 3.9E-1 (3.1E-1 - 4.7E-1) | 4.1E-1 (3.4E-1 - 5.0E-1) | -0.12                                         | 2.3E-01 | 3.2E-01 |
| SAH                                                | 7.9E-2 (6.0E-2 - 1.3E-1) | 5.4E-2 (4.3E-2 - 7.4E-2) | 0.74                                          | 4.7E-06 | 2.2E-05 |
| SAM                                                | 2.5E-1 (1.6E-1 - 3.6E-1) | 1.6E-1 (1.3E-1 - 2.5E-1) | 0.77                                          | 1.9E-03 | 5.2E-03 |
| <b>Glycine &amp; serine metabolism</b>             |                          |                          |                                               |         |         |
| Dimethylglycine                                    | 3.1 (2.7 - 3.5)          | 4.9 (3.9 - 6.5)          | -0.03                                         | 5.0E-01 | 6.1E-01 |
| Glyceric acid                                      | 2.2 (1.8 - 2.5)          | 1.5E-1 (1.0E-1 - 1.9E-1) | -0.11                                         | 5.0E-02 | 9.1E-02 |
| Glycine                                            | 1.1E-1 (9.0E-2 - 1.5E-1) | 3.3 (2.9 - 3.6)          | 0.07                                          | 9.2E-01 | 9.4E-01 |
| Serine                                             | 1.8 (1.3 - 2.5)          | 2.3 (2.1 - 2.7)          | -0.34                                         | 1.4E-03 | 3.8E-03 |
| Threonine                                          | 4.7 (3.7 - 6.7)          | 1.8 (1.7 - 2.3)          | -0.13                                         | 2.5E-02 | 5.2E-02 |
| <b>Phenylalanine metabolism</b>                    |                          |                          |                                               |         |         |
| Benzoic acid                                       | 3.7E-2 (3.0E-2 - 4.6E-2) | 3.9E-2 (3.0E-2 - 5.3E-2) | -0.11                                         | 4.6E-01 | 5.8E-01 |
| Hippuric acid                                      | 3.3E-2 (1.4E-2 - 8.4E-2) | 9.4E-2 (4.4E-2 - 1.9E-1) | 0.04                                          | 7.8E-01 | 8.3E-01 |
| Hydrocinnamic acid                                 | 9.1E-4 (2.7E-4 - 2.0E-3) | 1.2E-3 (3.8E-4 - 2.2E-3) | -0.53                                         | 2.0E-01 | 3.0E-01 |
| Phenylalanine                                      | 1.5 (1.2 - 1.9)          | 1.5 (1.2 - 1.7)          | -1.12                                         | 2.1E-05 | 8.6E-05 |
| <b>Tryptophan metabolism</b>                       |                          |                          |                                               |         |         |
| Indole-3-propanoic acid                            | 6.7E-4 (1.7E-4 - 1.6E-3) | 1.7E-3 (3.2E-4 - 3.3E-3) | -0.62                                         | 6.1E-03 | 1.5E-02 |
| Indolelactic acid                                  | 1.0E-2 (6.6E-3 - 1.3E-2) | 1.1E-2 (7.0E-3 - 1.5E-2) | -0.02                                         | 4.0E-01 | 5.1E-01 |
| <b>Tyrosine metabolism</b>                         |                          |                          |                                               |         |         |
| Vanillylmandelic acid                              | 1.1E-3 (8.1E-4 - 1.7E-3) | 1.7E-3 (1.3E-3 - 2.3E-3) | -0.35                                         | 1.9E-03 | 5.2E-03 |
| <b>Valine, leucine &amp; isoleucine metabolism</b> |                          |                          |                                               |         |         |
| 2-Hydroxybutyric acid                              | 9.3E-1 (6.2E-1 - 1.3)    | 7.1E-1 (5.4E-1 - 1.0)    | 0.59                                          | 9.1E-01 | 9.3E-01 |
| 2-Hydroxyisobutyric acid                           | 6.4E-2 (4.8E-2 - 1.0E-1) | 5.7E-2 (5.0E-2 - 1.3E-1) | 0.45                                          | 2.0E-02 | 4.1E-02 |
| 2-Hydroxyisovaleric acid                           | 2.1E-1 (1.3E-1 - 4.1E-1) | 1.8E-1 (1.2E-1 - 2.7E-1) | 0.54                                          | 1.9E-01 | 2.8E-01 |
| 2-keto-3-methylvaleric acid                        | 3.2E-2 (2.6E-2 - 4.1E-2) | 3.2E-2 (2.3E-2 - 4.3E-2) | 0.01                                          | 8.5E-01 | 8.9E-01 |
| 3-hydroxybutyric acid/3-hydroxyisobutyric acid     | 4.0E-1 (2.6E-1 - 1.0)    | 4.3E-1 (2.9E-1 - 7.1E-1) | 0.11                                          | 1.9E-01 | 2.8E-01 |
| 3-Hydroxyisovaleric acid                           | 5.3E-2 (3.4E-2 - 8.9E-2) | 3.9E-2 (3.2E-2 - 5.5E-2) | 0.65                                          | 5.8E-03 | 1.4E-02 |
| 3-methyl-2-oxobutyric acid                         | 1.1E-2 (8.4E-3 - 1.3E-2) | 1.0E-2 (7.2E-3 - 1.3E-2) | -0.26                                         | 9.7E-01 | 9.8E-01 |
| Isoleucine                                         | 1.1 (9.4E-1 - 1.3)       | 1.1 (9.4E-1 - 1.3)       | -0.05                                         | 6.0E-01 | 6.9E-01 |
| Leucine                                            | 2.2 (1.8 - 2.5)          | 2.1 (1.8 - 2.4)          | -0.01                                         | 7.0E-01 | 7.8E-01 |
| Valine                                             | 3.3 (2.9 - 3.7)          | 3.3 (2.9 - 3.7)          | -0.05                                         | 8.3E-01 | 8.8E-01 |
| <b>Carbohydrate metabolism</b>                     |                          |                          |                                               |         |         |

|                                                       |                          |                          |       |         |         |
|-------------------------------------------------------|--------------------------|--------------------------|-------|---------|---------|
| <b>Ascorbate and aldrate metabolism</b>               |                          |                          |       |         |         |
| Saccharic acid                                        | 5.3E-2 (3.3E-2 - 9.7E-2) | 5.1E-2 (3.9E-2 - 7.8E-2) | 2.95  | 5.2E-01 | 6.3E-01 |
| <b>C5-Branched dibasic acid metabolism</b>            |                          |                          |       |         |         |
| DL-2-Hydroxyglutaric acid                             | 2.1E-2 (1.7E-2 - 2.6E-2) | 2.1E-2 (1.7E-2 - 2.4E-2) | 0.04  | 6.5E-01 | 7.3E-01 |
| <b>Fructose &amp; mannose metabolism</b>              |                          |                          |       |         |         |
| d-Fructose                                            | 1.7E-1 (1.3E-1 - 2.6E-1) | 2.1E-1 (1.3E-1 - 3.8E-1) | 0.21  | 2.8E-01 | 3.8E-01 |
| d-Mannitol                                            | 9.8E-1 (2.8E-1 - 1.3)    | 1.2 (1.6E-1 - 2.4)       | -0.25 | 5.7E-01 | 6.6E-01 |
| d-Mannonic acid                                       | 3.4 (1.3 - 9.5)          | 1.8 (1.1 - 2.8)          | 1.74  | 2.1E-03 | 5.5E-03 |
| <b>Galactose metabolism</b>                           |                          |                          |       |         |         |
| d-Galactitol                                          | 9.4E-3 (6.0E-3 - 1.6E-2) | 1.2E-2 (7.5E-3 - 1.6E-2) | 0.33  | 3.7E-01 | 4.8E-01 |
| <b>Glycolisis</b>                                     |                          |                          |       |         |         |
| 3-Phosphoglyceric acid                                | 17 (14 - 19)             | 1.8E-3 (1.2E-3 - 2.4E-3) | -0.33 | 5.0E-03 | 1.2E-02 |
| Glucose 6-phosphate                                   | 1.4E-3 (9.2E-4 - 2.0E-3) | 2.1E-3 (1.6E-3 - 2.9E-3) | 0.29  | 3.5E-03 | 8.9E-03 |
| Lactic acid                                           | 2.6E-3 (2.1E-3 - 3.2E-3) | 19 (17 - 22)             | -0.23 | 2.0E-05 | 8.4E-05 |
| <b>Glyxolate and decarboxylate metabolism</b>         |                          |                          |       |         |         |
| Glycolic acid                                         | 8.4E-2 (6.9E-2 - 1.0E-1) | 8.5E-2 (7.1E-2 - 9.5E-2) | 0.09  | 7.3E-01 | 7.9E-01 |
| <b>Nucleotide sugar metabolism</b>                    |                          |                          |       |         |         |
| d-Arabinose                                           | 3.4E-2 (2.6E-2 - 4.7E-2) | 4.1E-2 (3.1E-2 - 6.6E-2) | -0.04 | 8.1E-03 | 1.9E-02 |
| d-Threitol                                            | 2.5E-2 (2.0E-2 - 3.2E-2) | 3.3E-2 (2.5E-2 - 3.9E-2) | -0.39 | 2.8E-03 | 7.3E-03 |
| d-Xylose                                              | 2.2E-2 (1.8E-2 - 3.6E-2) | 3.0E-2 (2.2E-2 - 3.7E-2) | -0.17 | 4.0E-02 | 7.8E-02 |
| Erythronic acid                                       | 2.9E-2 (2.0E-2 - 5.2E-2) | 3.1E-2 (2.2E-2 - 4.5E-2) | 0.11  | 8.8E-01 | 9.1E-01 |
| Threonic acid                                         | 3.8E-1 (2.9E-1 - 5.9E-1) | 4.4E-1 (3.2E-1 - 5.5E-1) | -0.06 | 4.7E-01 | 5.8E-01 |
| Xylonic acid                                          | 4.2E-2 (3.0E-2 - 6.1E-2) | 4.8E-2 (3.7E-2 - 6.4E-2) | -0.10 | 1.6E-01 | 2.5E-01 |
| <b>Pentose glucoronate interconversion metabolism</b> |                          |                          |       |         |         |
| d-Arabitol                                            | 9.0E-3 (7.1E-3 - 1.4E-2) | 9.9E-3 (8.4E-3 - 1.4E-2) | -0.08 | 2.2E-01 | 3.1E-01 |
| d-Xylitol                                             | 2.0E-3 (1.5E-3 - 4.5E-3) | 1.4E-3 (1.0E-3 - 2.0E-3) | 1.38  | 5.5E-05 | 2.1E-04 |
| Galactonic acid                                       | 2.7E-2 (1.2E-2 - 4.5E-2) | 2.7E-2 (1.1E-2 - 4.8E-2) | 2.56  | 7.2E-01 | 7.9E-01 |
| Galacturonic acid                                     | 8.4E-2 (4.8E-2 - 1.7E-1) | 6.0E-2 (3.9E-2 - 9.0E-2) | 1.25  | 5.6E-03 | 1.4E-02 |
| myo-Inositol                                          | 4.1E-1 (2.9E-1 - 5.8E-1) | 5.0E-1 (3.8E-1 - 6.0E-1) | -0.32 | 9.6E-03 | 2.2E-02 |
| <b>Pentose phosphate metabolism</b>                   |                          |                          |       |         |         |
| Sedoheptulose                                         | 4.8E-2 (3.6E-2 - 6.4E-2) | 6.5E-2 (4.3E-2 - 1.0E-1) | -0.56 | 1.5E-03 | 4.1E-03 |
| <b>Sucrose metabolism</b>                             |                          |                          |       |         |         |
| d-Sucrose                                             | 8.1E-3 (5.4E-3 - 2.0E-2) | 1.6E-2 (1.0E-2 - 3.4E-2) | -1.24 | 1.1E-05 | 4.9E-05 |
| Maltose                                               | 1.4E-2 (1.0E-2 - 2.2E-2) | 1.2E-2 (9.8E-3 - 1.8E-2) | 0.48  | 2.4E-01 | 3.3E-01 |
| <b>Tricarboxylic acid cycle metabolism</b>            |                          |                          |       |         |         |
| alpha-ketoglutaric acid                               | 7.3E-2 (5.4E-2 - 1.0E-1) | 5.9E-2 (4.7E-2 - 9.5E-2) | -0.01 | 7.2E-02 | 1.3E-01 |
| Citric acid                                           | 1.8 (1.2 - 2.7)          | 2.4 (1.8 - 3.6)          | -0.40 | 7.1E-04 | 2.2E-03 |
| Fumaric acid                                          | 1.0E-2 (7.6E-3 - 1.3E-2) | 1.4E-2 (1.1E-2 - 1.7E-2) | -0.53 | 5.3E-06 | 2.4E-05 |
| Glutamine                                             | 9.7 (5.8 - 14)           | 11 (7.4 - 14)            | -0.12 | 2.4E-01 | 3.3E-01 |
| Malic acid                                            | 4.1E-2 (3.1E-2 - 5.4E-2) | 5.6E-2 (4.5E-2 - 7.9E-2) | -0.61 | 1.0E-05 | 4.4E-05 |
| Pyruvic acid                                          | 9.2E-1 (6.5E-1 - 1.3)    | 6.9E-1 (4.8E-1 - 1.0)    | 0.33  | 8.4E-03 | 1.9E-02 |
| Succinic acid                                         | 7.6E-2 (6.0E-2 - 9.1E-2) | 1.3E-1 (1.1E-1 - 1.6E-1) | -0.79 | 4.4E-15 | 1.6E-13 |
| <b>Energy metabolism</b>                              |                          |                          |       |         |         |
| <b>Methane metabolism</b>                             |                          |                          |       |         |         |
| TMAO                                                  | 18 (7.8 - 30)            | 16 (7.7 - 27)            | 0.07  | 6.2E-01 | 7.0E-01 |
| <b>Oxidative phosphorylation</b>                      |                          |                          |       |         |         |
| Phosphoric acid                                       | 4.2 (3.5 - 5.4)          | 2.6 (2.1 - 3.4)          | 0.65  | 4.6E-09 | 3.8E-08 |
| <b>Lipid metabolism</b>                               |                          |                          |       |         |         |
| <b>Glycerolipid metabolism</b>                        |                          |                          |       |         |         |
| Choline                                               | 19 (16 - 25)             | 18 (16 - 21)             | 0.06  | 5.3E-01 | 6.4E-01 |
| Ethanolamine                                          | 8.6E-2 (6.9E-2 - 1.1E-1) | 1.0E-1 (8.7E-2 - 1.3E-1) | -0.33 | 7.6E-05 | 2.8E-04 |
| Glycerol                                              | 8.0E-1 (5.5E-1 - 1.2)    | 9.0E-1 (6.8E-1 - 1.4)    | -0.24 | 5.7E-02 | 1.0E-01 |
| Glycerol-1-phosphate                                  | 2.7E-2 (2.0E-2 - 3.5E-2) | 3.4E-2 (2.7E-2 - 4.3E-2) | -0.39 | 7.2E-04 | 2.2E-03 |



| Lipids                         |                          |                          |       |         |         |
|--------------------------------|--------------------------|--------------------------|-------|---------|---------|
| Dodecanoic acid                | 6.3E-2 (4.8E-2 - 8.0E-2) | 6.1E-2 (4.8E-2 - 7.3E-2) | 0.01  | 5.7E-01 | 6.6E-01 |
| Linoleic acid                  | 3.4E-1 (1.9E-1 - 6.1E-1) | 2.9E-1 (1.6E-1 - 4.4E-1) | 0.46  | 7.5E-02 | 1.3E-01 |
| Oleic acid                     | 3.1 (1.8 - 4.7)          | 2.0 (1.1 - 4.1)          | 0.33  | 3.8E-02 | 7.3E-02 |
| Tetradecanoic acid             | 2.4E-1 (1.9E-1 - 3.1E-1) | 2.2E-1 (1.7E-1 - 2.7E-1) | 0.14  | 7.5E-02 | 1.3E-01 |
| Primary bile acid biosynthesis |                          |                          |       |         |         |
| Taurine                        | 2.7 (1.7 - 4.4)          | 3.3 (2.5 - 4.9)          | -0.22 | 6.1E-02 | 1.1E-01 |
| Metabolism of cofactors        |                          |                          |       |         |         |
| Cofactor biosynthesis          |                          |                          |       |         |         |
| alpha-tocopherol               | 1.4E-2 (7.4E-3 - 2.4E-2) | 1.1E-2 (5.9E-3 - 2.0E-2) | 0.24  | 2.0E-01 | 2.9E-01 |
| Nucleotide metabolism          |                          |                          |       |         |         |
| Purine & pyrimidine            |                          |                          |       |         |         |
| Ethylmalonic acid              | 7.5E-1 (5.2E-1 - 9.7E-1) | 7.7E-1 (6.3E-1 - 1.1)    | -0.12 | 8.4E-02 | 1.4E-01 |
| Hypoxanthine                   | 4.9E-2 (3.1E-2 - 8.4E-2) | 1.2E-1 (4.6E-2 - 2.7E-1) | -1.41 | 7.9E-06 | 3.5E-05 |
| Ribonic acid                   | 1.3E-2 (7.6E-3 - 2.1E-2) | 1.4E-2 (1.1E-2 - 2.4E-2) | -0.22 | 7.7E-02 | 1.3E-01 |
| Uracil                         | 2.2E-3 (1.7E-3 - 2.8E-3) | 1.7E-3 (1.2E-3 - 2.0E-3) | 0.51  | 5.7E-05 | 2.2E-04 |
| Uric acid                      | 4.7 (2.8 - 7.6)          | 7.5 (5.2 - 9.6)          | -0.48 | 1.1E-04 | 4.0E-04 |
| Xenobiotic metabolism          |                          |                          |       |         |         |
| Benzoate degradation           |                          |                          |       |         |         |
| 4-Hydroxybenzoic acid          | 1.7E-2 (1.2E-2 - 2.1E-2) | 2.2E-2 (1.8E-2 - 2.7E-2) | -0.65 | 2.3E-06 | 1.2E-05 |

Results are shown as the molar percentage of total metabolites. Median  $\pm$  interquartile range (25 – 75) was calculated, and statistical significance was assessed with Wilcoxon rank-sum test and false-discovery rate (FDR  $q < 0.05$ ) correction by the Benjamini-Hochberg method. SAH, s-adenosylhomocysteine; SAM, s-adenosylmethionine; THF, tetrahydrofolate; TMAO, trimethylamine N-oxide.

**Supplementary Table S6.** Urine metabolites from COVID-19 positive and negative patients

| Metabolites<br>(ISR/mmol creatinine<br>percentage) | Covid-19<br>(n = 126)    | No-Covid-19<br>(n = 45)  | log <sub>2</sub> FC<br>(Covid-19<br>vs No-<br>Covid-19) | p-value | q-value |
|----------------------------------------------------|--------------------------|--------------------------|---------------------------------------------------------|---------|---------|
| <b>Amino acid metabolism</b>                       |                          |                          |                                                         |         |         |
| <b>Alanine &amp; aspartate metabolism</b>          |                          |                          |                                                         |         |         |
| 2-ketoisocaproic acid                              | 9.7E-3 (7.2E-3 - 1.4E-2) | 9.4E-3 (7.0E-3 - 1.3E-2) | 0.11                                                    | 6.7E-01 | 7.5E-01 |
| Alanine                                            | 1.8 (1.2 - 2.7)          | 2.2 (1.4 - 2.9)          | -0.16                                                   | 2.0E-01 | 3.0E-01 |
| Aspartic acid                                      | 8.1E-2 (6.5E-2 - 1.1E-1) | 7.9E-2 (6.0E-2 - 1.3E-1) | -0.09                                                   | 1       | 1       |
| Glutamic acid                                      | 3.9E-1 (2.3E-1 - 5.6E-1) | 3.3E-1 (2.0E-1 - 5.1E-1) | 0.29                                                    | 2.6E-01 | 3.5E-01 |
| N-methylglutamic acid                              | 3.9E-3 (1.7E-3 - 8.6E-3) | 2.5E-3 (1.1E-3 - 7.7E-3) | 0.27                                                    | 1.3E-01 | 2.1E-01 |
| <b>Arginine &amp; proline metabolism</b>           |                          |                          |                                                         |         |         |
| Oxoproline                                         | 4.3E-1 (3.1E-1 - 5.7E-1) | 4.3E-1 (2.9E-1 - 6.3E-1) | -0.03                                                   | 7.2E-01 | 7.9E-01 |
| <b>Cysteine &amp; methionine metabolism</b>        |                          |                          |                                                         |         |         |
| Methionine                                         | 4.5 (3.6 - 5.9)          | 4.6 (3.7 - 5.9)          | -0.05                                                   | 8.7E-01 | 9.0E-01 |
| <b>Glycine &amp; serine metabolism</b>             |                          |                          |                                                         |         |         |
| Glyceric acid                                      | 3.9E-1 (2.5E-1 - 5.9E-1) | 3.4E-1 (2.1E-1 - 5.6E-1) | 0.24                                                    | 1.7E-01 | 2.5E-01 |
| Glycine                                            | 3.1 (2.5 - 3.8)          | 2.7 (2.1 - 3.5)          | 0.21                                                    | 3.5E-02 | 6.9E-02 |
| Serine                                             | 2.0 (1.2 - 3.0)          | 1.5 (8.1E-1 - 2.3)       | 0.46                                                    | 8.2E-03 | 1.9E-02 |
| Threonine                                          | 8.1E-1 (5.2E-1 - 1.3)    | 6.6E-1 (2.7E-1 - 8.7E-1) | 0.49                                                    | 9.8E-03 | 2.2E-02 |
| <b>Histidine metabolism</b>                        |                          |                          |                                                         |         |         |
| 5-hydroxyindole-3-acetic acid                      | 9.7E-2 (6.1E-2 - 1.6E-1) | 1.2E-1 (8.0E-2 - 1.7E-1) | -0.65                                                   | 4.6E-02 | 8.6E-02 |
| <b>Phenylalanine metabolism</b>                    |                          |                          |                                                         |         |         |
| 4-hydroxyPhenylacetic acid                         | 4.6E-1 (2.4E-1 - 1.6E+0) | 4.3E-1 (2.9E-1 - 7.1E-1) | 0.54                                                    | 6.1E-01 | 7.0E-01 |
| Benzoic acid                                       | 7.3E-2 (4.4E-2 - 1.2E-1) | 9.8E-2 (5.4E-2 - 2.2E-1) | -1.50                                                   | 1.9E-02 | 4.0E-02 |
| Hippuric acid                                      | 1.7 (6.2E-1 - 4.8)       | 3.4 (1.8 - 5.9)          | -0.53                                                   | 4.1E-03 | 1.0E-02 |
| Phenylalanine                                      | 6.6E-1 (4.0E-1 - 9.4E-1) | 5.0E-1 (3.2E-1 - 6.7E-1) | 0.42                                                    | 1.1E-02 | 2.5E-02 |
| <b>Protein digestion and absorption</b>            |                          |                          |                                                         |         |         |
| p-Cresol                                           | 8.6E-1 (2.5E-1 - 2.1)    | 1.3 (7.0E-1 - 2.6)       | -0.47                                                   | 4.6E-02 | 8.6E-02 |
| <b>Tryptophan metabolism</b>                       |                          |                          |                                                         |         |         |
| 5-hydroxyindole-3-acetic acid                      | 9.7E-2 (6.1E-2 - 1.6E-1) | 1.2E-1 (8.0E-2 - 1.7E-1) | -0.17                                                   | 1.5E-01 | 2.4E-01 |
| Quinolinic acid                                    | 6.6E-2 (3.7E-2 - 1.5E-1) | 6.4E-2 (2.9E-2 - 9.0E-2) | 1.12                                                    | 1.4E-01 | 2.2E-01 |
| <b>Tyrosine metabolism</b>                         |                          |                          |                                                         |         |         |
| Homovanillic                                       | 8.8E-2 (5.9E-2 - 1.2E-1) | 8.3E-2 (5.9E-2 - 1.1E-1) | -0.18                                                   | 5.7E-01 | 6.6E-01 |
| 3,4-Dihydroxyphenylacetic acid                     | 7.6E-2 (3.8E-2 - 1.6E-1) | 1.5E-1 (1.0E-1 - 2.3E-1) | -0.97                                                   | 8.3E-04 | 2.4E-03 |
| Hydroxyphenyllactic acid                           | 8.7E-2 (3.9E-2 - 1.7E-1) | 7.3E-2 (2.4E-2 - 1.5E-1) | -0.05                                                   | 4.3E-02 | 8.2E-02 |
| Vanillylmandelic acid                              | 1.7E-1 (1.1E-1 - 2.7E-1) | 1.8E-1 (1.1E-1 - 3.4E-1) | -0.12                                                   | 4.7E-01 | 5.8E-01 |
| 4-hydroxyPhenylpyruvic acid                        | 3.1E-2 (2.1E-2 - 4.4E-2) | 2.7E-2 (1.9E-2 - 4.3E-2) | 0.23                                                    | 1.9E-01 | 2.9E-01 |
| Tyrosine                                           | 6.4E-1 (2.7E-1 - 2.8)    | 5.0E-1 (1.7E-1 - 1.6)    | 0.74                                                    | 1.9E-01 | 2.8E-01 |
| <b>Valine, leucine &amp; isoleucine metabolism</b> |                          |                          |                                                         |         |         |
| 2-HydroxyButyric acid                              | 1.9E-1 (1.2E-1 - 3.6E-1) | 1.8E-1 (1.2E-1 - 2.9E-1) | 0.09                                                    | 4.0E-01 | 5.1E-01 |
| 2-Hydroxyisobutyric acid                           | 1.6 (1.0 - 2.6)          | 1.8 (9.6E-1 - 2.2)       | 0                                                       | 8.1E-01 | 8.6E-01 |
| 2-Hydroxyisovaleric acid                           | 1.2E-1 (6.3E-2 - 2.6E-1) | 1.0E-1 (5.7E-2 - 2.0E-1) | 0.53                                                    | 6.7E-03 | 1.6E-02 |
| 2-keto-3-methylvaleric acid                        | 1.6E-2 (1.1E-2 - 2.6E-2) | 1.3E-2 (8.2E-3 - 2.3E-2) | 0.11                                                    | 2.0E-01 | 2.9E-01 |
| 3-hydroxy-2-Methylbutanoic acid                    | 2.0E-1 (1.3E-1 - 3.0E-1) | 1.6E-1 (1.1E-1 - 2.8E-1) | 0.21                                                    | 1.1E-01 | 1.8E-01 |
| 3-hydroxy-3-Methylglutaric acid                    | 3.6E-2 (2.5E-2 - 5.6E-2) | 4.2E-2 (3.3E-2 - 6.2E-2) | -0.27                                                   | 7.8E-02 | 1.3E-01 |
| 3-hydroxybutyric acid/3-hydroxyisobutyric acid     | 1.1E-1 (6.8E-2 - 2.3E-1) | 1.2E-1 (5.8E-2 - 1.9E-1) | 1.10                                                    | 7.8E-01 | 8.3E-01 |
| 3-Hydroxyisovaleric acid                           | 1.4 (7.6E-1 - 2.3)       | 9.6E-1 (4.4E-1 - 1.5)    | 0.53                                                    | 6.7E-03 | 1.6E-02 |



|                                                       |                          |                          |       |         |         |
|-------------------------------------------------------|--------------------------|--------------------------|-------|---------|---------|
| 3-Methylglutaconic acid                               | 7.2E-2 (4.7E-2 - 1.1E-1) | 8.0E-2 (4.8E-2 - 1.4E-1) | -0.66 | 4.3E-01 | 5.4E-01 |
| 3-Methylglutaric acid                                 | 4.8E-2 (2.9E-2 - 7.0E-2) | 4.2E-2 (2.8E-2 - 6.0E-2) | 0.35  | 2.9E-01 | 3.9E-01 |
| Isoleucine                                            | 1.1E-1 (8.2E-2 - 1.5E-1) | 7.7E-2 (3.9E-2 - 1.1E-1) | 0.53  | 4.8E-04 | 1.5E-03 |
| Leucine                                               | 3.0E-1 (2.1E-1 - 4.3E-1) | 2.2E-1 (1.1E-1 - 2.8E-1) | 0.61  | 4.7E-04 | 1.5E-03 |
| Methylmalonic                                         | 1.3E-2 (7.0E-3 - 2.2E-2) | 2.1E-2 (8.7E-3 - 3.1E-2) | -0.30 | 6.1E-02 | 1.1E-01 |
| Tiglylglycine                                         | 6.9E-2 (4.1E-2 - 1.1E-1) | 6.1E-2 (3.9E-2 - 1.1E-1) | 0.02  | 6.2E-01 | 7.0E-01 |
| Valine                                                | 3.9E-1 (2.7E-1 - 5.5E-1) | 2.7E-1 (1.5E-1 - 4.1E-1) | 0.65  | 4.0E-04 | 1.3E-03 |
| <b>Biosynthesis of secondary metabolites</b>          |                          |                          |       |         |         |
| <b>Biosynthesis of various alkaloids</b>              |                          |                          |       |         |         |
| 3-hydroxypropanoic acid                               | 2.4E-1 (1.4E-1 - 4.2E-1) | 1.9E-1 (1.0E-1 - 4.2E-1) | -0.11 | 4.2E-01 | 5.3E-01 |
| <b>Flavanoid metabolism</b>                           |                          |                          |       |         |         |
| Quinic acid                                           | 1.7E-1 (6.2E-2 - 3.7E-1) | 4.7E-1 (1.1E-1 - 1.2)    | -1.07 | 1.3E-04 | 4.3E-04 |
| <b>Carbohydrate metabolism</b>                        |                          |                          |       |         |         |
| <b>Ascorbate and aldrate metabolism</b>               |                          |                          |       |         |         |
| Saccharic acid                                        | 1.6E-1 (9.7E-2 - 2.6E-1) | 1.1E-1 (5.5E-2 - 1.6E-1) | 0.98  | 1.4E-03 | 3.8E-03 |
| <b>C5-Branched dibasic acid metabolism</b>            |                          |                          |       |         |         |
| Methylsuccinic                                        | 5.8E-2 (4.1E-2 - 9.4E-2) | 6.3E-2 (5.2E-2 - 1.2E-1) | -0.01 | 1.7E-01 | 2.5E-01 |
| <b>Fructose &amp; mannose metabolism</b>              |                          |                          |       |         |         |
| 1-Deoxysorbitol                                       | 1.2 (8.0E-1 - 1.9)       | 1.7 (1.1 - 2.2)          | -0.29 | 4.9E-02 | 9.0E-02 |
| Allose                                                | 2.8E-1 (1.6E-1 - 4.0E-1) | 2.9E-1 (1.6E-1 - 4.2E-1) | -0.12 | 7.6E-01 | 8.2E-01 |
| d-Fructose                                            | 3.5E-2 (2.4E-2 - 6.2E-2) | 4.0E-2 (2.5E-2 - 7.3E-2) | 0.12  | 5.5E-01 | 6.5E-01 |
| d-Mannitol                                            | 5.5E-1 (2.6E-1 - 1.7)    | 4.3E-1 (2.1E-1 - 1.1)    | 0.53  | 1.4E-01 | 2.2E-01 |
| d-Psicose                                             | 4.4E-2 (2.6E-2 - 8.9E-2) | 4.3E-2 (2.8E-2 - 7.6E-2) | 0.39  | 8.7E-01 | 9.0E-01 |
| d-Sorbitol                                            | 8.6E-2 (4.7E-2 - 1.3E-1) | 7.9E-2 (3.9E-2 - 1.2E-1) | -0.74 | 3.5E-01 | 4.6E-01 |
| l-Fucose                                              | 4.6E-2 (3.0E-2 - 6.1E-2) | 4.3E-2 (2.5E-2 - 6.8E-2) | -0.09 | 9.3E-01 | 9.5E-01 |
| <b>Galactose metabolism</b>                           |                          |                          |       |         |         |
| d-Galactitol                                          | 4.3E-2 (3.2E-2 - 5.5E-2) | 5.0E-2 (3.2E-2 - 6.5E-2) | -0.17 | 1.6E-01 | 2.4E-01 |
| d-Galactose                                           | 3.6 (2.7 - 5.0)          | 3.2 (2.3 - 3.8)          | 0.05  | 2.8E-01 | 3.8E-01 |
| d-Galactose                                           | 1.0E-1 (8.5E-2 - 1.4E-1) | 9.8E-2 (7.5E-2 - 1.2E-1) | 0.23  | 4.3E-02 | 8.2E-02 |
| <b>Glycolysis</b>                                     |                          |                          |       |         |         |
| Citramalic acid                                       | 6.1E-3 (3.9E-3 - 9.3E-3) | 1.0E-2 (7.1E-3 - 1.6E-2) | -0.62 | 1.0E-04 | 3.7E-04 |
| d-Glucose                                             | 4.6E-1 (3.5E-1 - 6.5E-1) | 3.7E-1 (1.7E-1 - 5.2E-1) | -0.09 | 3.2E-02 | 6.4E-02 |
| d-Glucose                                             | 8.4E-2 (6.5E-2 - 1.2E-1) | 6.7E-2 (4.2E-2 - 1.1E-1) | 0.33  | 1.1E-02 | 2.5E-02 |
| Lactic acid                                           | 1.1 (7.9E-1 - 2.1)       | 1.7 (1.1 - 3.7)          | -0.94 | 9.7E-04 | 2.8E-03 |
| <b>Glyxolate and decarboxylate metabolism</b>         |                          |                          |       |         |         |
| Glycolic acid                                         | 7.7E-1 (5.2E-1 - 1.4)    | 7.0E-1 (3.7E-1 - 1.3)    | 0.17  | 4.0E-01 | 5.1E-01 |
| <b>Nucleotide sugar metabolism</b>                    |                          |                          |       |         |         |
| d-Arabinose                                           | 2.3E-2 (1.4E-2 - 4.0E-2) | 2.2E-2 (1.4E-2 - 3.7E-2) | 0.52  | 5.6E-01 | 6.6E-01 |
| d-Glucuronic acid                                     | 1.1E-1 (6.4E-2 - 3.7E-1) | 6.1E-2 (4.0E-2 - 1.1E-1) | 1.75  | 3.7E-05 | 1.5E-04 |
| d-Threitol                                            | 2.3E-1 (1.8E-1 - 2.8E-1) | 2.6E-1 (1.9E-1 - 3.1E-1) | -0.19 | 2.4E-02 | 4.9E-02 |
| d-Xylose                                              | 4.9E-3 (3.1E-3 - 8.3E-3) | 4.4E-3 (2.7E-3 - 6.8E-3) | 0.60  | 1.4E-01 | 2.2E-01 |
| Erythronic acid                                       | 7.8 (5.9 - 11)           | 8.1 (6.2 - 10)           | 0.15  | 8.5E-01 | 8.9E-01 |
| Threonic acid                                         | 7.7E-1 (4.9E-1 - 1.1)    | 7.3E-1 (4.7E-1 - 1.2)    | -0.36 | 8.3E-01 | 8.8E-01 |
| Xylonic acid                                          | 4.4E-1 (2.9E-1 - 6.7E-1) | 5.0E-1 (3.3E-1 - 7.8E-1) | -0.68 | 1.8E-01 | 2.7E-01 |
| <b>Pentose glucoronate interconversion metabolism</b> |                          |                          |       |         |         |
| d-Arabitol                                            | 1.2E-1 (9.8E-2 - 1.6E-1) | 1.4E-1 (1.0E-1 - 1.7E-1) | -0.08 | 3.9E-01 | 5.0E-01 |
| d-Gluconic acid                                       | 8.3E-2 (5.1E-2 - 1.6E-1) | 6.1E-2 (4.3E-2 - 1.0E-1) | 0.67  | 3.6E-02 | 7.2E-02 |
| d-Ribose                                              | 1.7E-2 (1.1E-2 - 2.3E-2) | 1.4E-2 (9.1E-3 - 1.8E-2) | 0.40  | 4.1E-02 | 7.9E-02 |
| d-Xylitol                                             | 2.6E-2 (1.5E-2 - 5.8E-2) | 1.6E-2 (1.1E-2 - 2.3E-2) | 1.85  | 1.8E-04 | 6.2E-04 |
| Galacturonic acid                                     | 1.2E-1 (5.8E-2 - 2.9E-1) | 5.9E-2 (3.1E-2 - 9.3E-2) | 1.74  | 1.9E-05 | 8.0E-05 |
| meso-Erythritol                                       | 2.6 (1.6 - 3.9)          | 2.8 (2.0 - 5.5)          | -0.11 | 3.3E-01 | 4.3E-01 |
| myo-Inositol                                          | 4.9E-2 (2.2E-2 - 1.1E-1) | 2.6E-2 (1.2E-2 - 5.6E-2) | 0.95  | 2.3E-03 | 6.1E-03 |
| Xylulose                                              | 1.9E-1 (1.3E-1 - 3.6E-1) | 1.6E-1 (9.7E-2 - 2.2E-1) | 1.04  | 9.1E-03 | 2.1E-02 |
| <b>Sucrose metabolism</b>                             |                          |                          |       |         |         |
| d-Lactose                                             | 6.3E-1 (4.3E-1 - 8.9E-1) | 6.5E-1 (4.2E-1 - 8.7E-1) | 0.07  | 7.5E-01 | 8.1E-01 |
| d-Lactose                                             | 6.9E-1 (4.7E-1 - 9.9E-1) | 6.7E-1 (4.3E-1 - 9.5E-1) | 0.09  | 7.0E-01 | 7.7E-01 |
| d-Maltose                                             | 8.5E-2 (2.9E-2 - 2.8E-1) | 1.1E-1 (3.4E-2 - 3.9E-1) | -0.24 | 3.0E-01 | 4.0E-01 |
| d-Sucrose                                             | 2.6E-1 (1.2E-1 - 4.6E-1) | 3.0E-1 (1.2E-1 - 6.4E-1) | -0.61 | 3.1E-01 | 4.1E-01 |
| <b>Tricarboxylic acid cycle metabolism</b>            |                          |                          |       |         |         |

|                                |                          |                          |       |         |         |
|--------------------------------|--------------------------|--------------------------|-------|---------|---------|
| 2-Hydroxyglutaric acid         | 5.9E-2 (3.1E-2 - 1.0E-1) | 6.3E-2 (3.8E-2 - 1.1E-1) | -0.16 | 3.3E-01 | 4.3E-01 |
| 2-methylcitric acid            | 7.2E-2 (5.4E-2 - 1.1E-1) | 8.0E-2 (5.2E-2 - 1.3E-1) | -0.54 | 5.5E-01 | 6.5E-01 |
| Aconitic acid                  | 3.5E-1 (2.1E-1 - 5.9E-1) | 4.5E-1 (2.5E-1 - 5.9E-1) | -0.18 | 1.8E-01 | 2.7E-01 |
| alpha-ketoglutaric acid        | 5.0E-1 (3.8E-1 - 8.5E-1) | 5.5E-1 (3.5E-1 - 7.9E-1) | -0.23 | 9.6E-01 | 9.8E-01 |
| Citric acid                    | 2.2 (9.8E-1 - 4.4)       | 3.1 (9.2E-1 - 5.5)       | -0.65 | 3.4E-01 | 4.4E-01 |
| Fumaric acid                   | 2.3E-1 (1.6E-1 - 3.7E-1) | 2.1E-1 (1.3E-1 - 3.4E-1) | 0.03  | 2.9E-01 | 3.9E-01 |
| Glutamine                      | 9.8E-3 (1.9E-3 - 4.3E-2) | 6.3E-3 (1.9E-3 - 4.5E-2) | 0.45  | 7.1E-01 | 7.8E-01 |
| Malic acid                     | 4.3E-2 (2.7E-2 - 6.5E-2) | 5.1E-2 (2.5E-2 - 6.8E-2) | -0.52 | 5.9E-01 | 6.8E-01 |
| Malonic acid                   | 3.7E-3 (2.9E-3 - 5.2E-3) | 3.8E-3 (2.2E-3 - 5.0E-3) | 0.07  | 4.3E-01 | 5.4E-01 |
| Pyruvic acid                   | 9.7E-1 (6.8E-1 - 1.5)    | 1.3 (7.6E-1 - 2.0)       | -0.46 | 4.9E-02 | 8.9E-02 |
| Succinic acid                  | 1.2E-1 (7.3E-2 - 2.1E-1) | 1.3E-1 (8.6E-2 - 2.8E-1) | -0.77 | 4.3E-01 | 5.4E-01 |
| Tartaric acid                  | 1.4E-2 (7.6E-3 - 7.1E-2) | 1.7E-2 (7.1E-3 - 4.5E-2) | 1.39  | 9.0E-01 | 9.2E-01 |
| <b>Lipid metabolism</b>        |                          |                          |       |         |         |
| <b>Glycerolipid metabolism</b> |                          |                          |       |         |         |
| Ethanolamine                   | 3.4 (2.2 - 6.1)          | 3.1 (1.8 - 5.0)          | 0.18  | 4.2E-01 | 5.3E-01 |
| Glycerol                       | 7.0E-3 (5.2E-3 - 9.7E-3) | 4.7E-3 (3.4E-3 - 6.6E-3) | 0.87  | 1.1E-04 | 4.0E-04 |
| Glycerol-1-phosphate           | 9.0E-3 (5.9E-3 - 1.4E-2) | 8.5E-3 (5.7E-3 - 1.3E-2) | 0.06  | 9.0E-01 | 9.2E-01 |
| <b>Lipids</b>                  |                          |                          |       |         |         |
| Palmitic acid                  | 1.2 (9.1 - 1.9)          | 1.4E+1 (9.7 - 2.1E+1)    | -0.06 | 5.3E-01 | 6.4E-01 |
| Suberic acid                   | 5.7E-2 (4.0E-2 - 8.7E-2) | 6.3E-2 (4.0E-2 - 8.9E-2) | 0.03  | 8.8E-01 | 9.1E-01 |
| <b>Metabolism of cofactors</b> |                          |                          |       |         |         |
| <b>Cofactor biosynthesis</b>   |                          |                          |       |         |         |
| 4-pyridoxic acid               | 1.0E-2 (7.2E-3 - 1.7E-2) | 9.6E-3 (6.8E-3 - 1.7E-2) | -2.44 | 5.1E-01 | 6.2E-01 |
| <b>Nucleotide metabolism</b>   |                          |                          |       |         |         |
| <b>Purine &amp; pyrimidine</b> |                          |                          |       |         |         |
| Adenine                        | 2.0E-1 (1.0E-1 - 3.8E-1) | 1.7E-1 (1.0E-1 - 2.5E-1) | 0.27  | 2.2E-01 | 3.1E-01 |
| Dihydroorotic acid             | 9.0E-1 (6.4E-1 - 1.3)    | 8.5E-1 (6.1E-1 - 1.1)    | 0.23  | 1.7E-01 | 2.6E-01 |
| Hypoxanthine                   | 9.5E-1 (4.0E-1 - 2.2E+0) | 5.7E-1 (2.7E-1 - 1.3)    | 0.40  | 1.2E-01 | 2.0E-01 |
| Orotic acid                    | 3.5E-2 (1.9E-2 - 5.3E-2) | 3.6E-2 (2.1E-2 - 7.6E-2) | -0.40 | 2.9E-01 | 3.9E-01 |
| Oxalic acid                    | 5.9E-1 (3.6E-1 - 8.1E-1) | 4.6E-1 (3.1E-1 - 6.9E-1) | 0.36  | 6.1E-02 | 1.1E-01 |
| Ribonic acid                   | 1.3E-1 (7.5E-2 - 2.1E-1) | 1.8E-1 (1.0E-1 - 2.9E-1) | -0.27 | 3.1E-02 | 6.4E-02 |
| Thymine                        | 1.9E-3 (1.3E-3 - 2.7E-3) | 2.2E-3 (1.4E-3 - 3.2E-3) | 0.00  | 5.6E-01 | 6.6E-01 |
| Uracil                         | 5.3E-1 (3.0E-1 - 7.9E-1) | 5.4E-1 (3.5E-1 - 8.1E-1) | -0.29 | 5.5E-01 | 6.5E-01 |
| Uric acid                      | 6.4 (4.6 - 8.2)          | 5.2 (3.4 - 7.2)          | 0.28  | 1.5E-02 | 3.3E-02 |
| Xanthine                       | 1.9E-2 (1.1E-2 - 3.0E-2) | 1.6E-2 (1.1E-2 - 2.4E-2) | -0.21 | 5.3E-01 | 6.4E-01 |
| <b>Xenobiotic metabolism</b>   |                          |                          |       |         |         |
| <b>Benzoate degradation</b>    |                          |                          |       |         |         |
| 4-Hydroxybenzoic acid          | 1.0E-1 (6.1E-2 - 1.8E-1) | 1.4E-1 (9.3E-2 - 2.4E-1) | -0.13 | 3.7E-02 | 7.2E-02 |
| <b>Caprolactam degradation</b> |                          |                          |       |         |         |
| Adipic acid                    | 2.2E-1 (1.2E-1 - 5.2E-1) | 2.0E-1 (8.8E-2 - 4.6E-1) | 0.18  | 3.1E-01 | 4.1E-01 |

Results are shown as the internal standard/mmol creatinine percentage of total metabolite. Median  $\pm$  interquartile range (25 – 75) was calculated, and statistical significance was assessed with Wilcoxon rank-sum test and false-discovery rate (FDR  $q < 0.05$ ) correction by the Benjamini-Hochberg method.
